# Supplementary material
Source: publisher figshare collection journal article supplement (https://diabetesjournals.figshare.com/ndownloader/files/28979574)
Supplement: Supplementary file 1 [file 28979574]

## Sheet: results_gene_annotated_signific
	baseMean	log2FoldChange	lfcSE	stat	pvalue	padj	description	symbol	entrez	ensembl
AL645608.2	28.9859	-1.77156	1.32384	7.39008	0.0248465	0.0248465	NA	AL645608.2	NA	NA
LINC02593	142.584	-2.85694	1.36622	8.79968	0.0122793	0.0122793	long intergenic non-protein coding RNA 2593	LINC02593	100130417	ENSG00000223764
SAMD11	322.675	-3.84491	1.72505	6.84075	0.0327002	0.0327002	sterile alpha motif domain containing 11	SAMD11	148398	ENSG00000187634
AL645608.7	66.6161	-3.59391	1.31992	8.78435	0.0123738	0.0123738	NA	AL645608.7	NA	NA
RNF223	12.083	-5.93194	2.26722	7.02217	0.0298646	0.0298646	ring finger protein 223	RNF223	401934	ENSG00000237330
PRDM16-DT	65.7181	-4.83344	1.81155	7.80616	0.0201796	0.0201796	PRDM16 divergent transcript	PRDM16-DT	440556	ENSG00000177133
AL034417.3	2.22623	-3.79308	1.93305	7.53958	0.0230569	0.0230569	NA	AL034417.3	NA	NA
RPL7P11	4.09808	1.61271	1.50647	6.70549	0.0349881	0.0349881	ribosomal protein L7 pseudogene 11	RPL7P11	100270823	NA
KIF1B	5096.88	-0.675245	0.278465	5.99515	0.049908	0.049908	kinesin family member 1B	KIF1B	23095	ENSG00000054523
HSPG2	14042.1	-2.2568	0.760372	8.29955	0.015768	0.015768	heparan sulfate proteoglycan 2	HSPG2	3339	ENSG00000142798
AL445253.1	5.66209	-1.92513	1.26061	6.44642	0.039827	0.039827	NA	AL445253.1	NA	NA
NIPAL3	505.685	1.29886	0.508863	6.63297	0.0362802	0.0362802	NIPA like domain containing 3	NIPAL3	57185	ENSG00000001461
SNORA73B	74.4443	0.736451	0.509206	6.93067	0.0312626	0.0312626	small nucleolar RNA, H/ACA box 73B	SNORA73B	26768	ENSG00000200087
EPB41	2538.87	-1.20596	0.39695	9.9708	0.00683704	0.00683704	erythrocyte membrane protein band 4.1	EPB41	2035	ENSG00000159023
TINAGL1	354.343	-3.76546	1.22097	8.8729	0.0118379	0.0118379	tubulointerstitial nephritis antigen like 1	TINAGL1	64129	ENSG00000142910
HPCAL4	38.6128	4.66874	1.60289	8.38171	0.0151334	0.0151334	hippocalcin like 4	HPCAL4	51440	ENSG00000116983
TRIT1	883.789	-0.34882	0.167498	6.30026	0.0428466	0.0428466	tRNA isopentenyltransferase 1	TRIT1	54802	ENSG00000043514
SLC2A1	8554.13	2.83167	0.554028	25.8602	2.424e-06	2.424e-06	solute carrier family 2 member 1	SLC2A1	6513	ENSG00000117394
FAM183A	44.1024	1.71765	0.929826	7.57222	0.0226837	0.0226837	family with sequence similarity 183 member A	FAM183A	440585	ENSG00000186973
CCDC163	119.589	0.135747	0.596689	6.25451	0.0438379	0.0438379	coiled-coil domain containing 163	CCDC163	126661	ENSG00000280670
ACOT11	98.9267	-1.04386	0.554089	6.98164	0.0304759	0.0304759	acyl-CoA thioesterase 11	ACOT11	26027	ENSG00000162390
LINC01767	22.9976	-3.32002	1.35931	9.57629	0.00832789	0.00832789	long intergenic non-protein coding RNA 1767	LINC01767	105378744	ENSG00000223956
FGGY	125.374	-1.38541	0.545546	9.36755	0.00924405	0.00924405	FGGY carbohydrate kinase domain containing	FGGY	55277	ENSG00000172456
PTGER3	31.5357	4.8372	1.78586	6.11231	0.0470682	0.0470682	prostaglandin E receptor 3	PTGER3	5733	ENSG00000050628
LHX8	36.8542	-5.44434	1.50246	13.2015	0.00135936	0.00135936	LIM homeobox 8	LHX8	431707	ENSG00000162624
AC099786.2	10.9556	-7.39925	2.49437	7.18376	0.0275465	0.0275465	NA	AC099786.2	NA	NA
LINC01361	12.3778	0.0170201	0.910658	6.47544	0.0392533	0.0392533	long intergenic non-protein coding RNA 1361	LINC01361	101927498	ENSG00000236268
TTLL7	263.791	-0.963893	0.665364	10.7049	0.00473664	0.00473664	tubulin tyrosine ligase like 7	TTLL7	79739	ENSG00000137941
SSX2IP	816.138	-1.78413	0.533982	10.9798	0.00412833	0.00412833	SSX family member 2 interacting protein	SSX2IP	117178	ENSG00000117155
DIPK1A	403.502	1.09972	0.431978	6.36963	0.0413859	0.0413859	divergent protein kinase domain 1A	DIPK1A	388650	ENSG00000154511
MTCO1P21	58.5772	2.7349	1.67857	10.2654	0.00590073	0.00590073	MT-CO1 pseudogene 21	MTCO1P21	107075164	NA
AC092802.4	1.9802	-4.5705	2.1772	6.31643	0.0425016	0.0425016	NA	AC092802.4	NA	NA
RPL7P9	138.752	-0.448144	0.25998	6.34973	0.0417998	0.0417998	ribosomal protein L7 pseudogene 9	RPL7P9	653702	NA
CDC14A	363.292	-1.48138	0.508082	8.59932	0.0135732	0.0135732	cell division cycle 14A	CDC14A	8556	ENSG00000079335
HENMT1	161.435	1.05268	0.431035	6.00723	0.0496073	0.0496073	HEN methyltransferase 1	HENMT1	113802	ENSG00000162639
AKNAD1	25.0733	1.49797	1.579	8.86729	0.0118711	0.0118711	AKNA domain containing 1	AKNAD1	254268	ENSG00000162641
SLC6A17	18.048	2.28664	1.00907	12.2363	0.00220252	0.00220252	solute carrier family 6 member 17	SLC6A17	388662	ENSG00000197106
CYMP-AS1	13.602	-4.32158	1.39122	10.204	0.00608455	0.00608455	CYMP antisense RNA 1	CYMP-AS1	440602	ENSG00000235407
VTCN1	108.517	-3.43304	1.29239	6.83334	0.0328215	0.0328215	V-set domain containing T cell activation inhibitor 1	VTCN1	79679	ENSG00000134258
WARS2-AS1	301.6	0.462158	0.302536	8.45249	0.0146072	0.0146072	WARS2 antisense RNA 1	WARS2-AS1	101929147	ENSG00000231365
AC241585.2	10.3838	1.4111	0.81247	6.37192	0.0413385	0.0413385	NA	AC241585.2	NA	NA
H2BC21	136.023	1.93804	0.599831	11.8105	0.00272511	0.00272511	H2B clustered histone 21	H2BC21	8349	ENSG00000184678
AC244033.2	61.6734	1.43287	0.601056	6.04598	0.0486554	0.0486554	NA	AC244033.2	NA	NA
CTSK	213.747	0.706643	0.527651	7.70121	0.0212668	0.0212668	cathepsin K	CTSK	1513	ENSG00000143387
THEM4	459.209	1.66737	0.592145	7.5376	0.0230798	0.0230798	thioesterase superfamily member 4	THEM4	117145	ENSG00000159445
TCHH	24.7642	4.46509	1.45993	10.5283	0.00517388	0.00517388	trichohyalin	TCHH	7062	ENSG00000159450
NPR1	378.027	5.00929	1.02452	21.3319	2.33262e-05	2.33262e-05	natriuretic peptide receptor 1	NPR1	4881	ENSG00000169418
CRTC2	866.504	0.543782	0.228662	6.62766	0.0363766	0.0363766	CREB regulated transcription coactivator 2	CRTC2	200186	ENSG00000160741
UBAP2L	6035.66	0.866322	0.288532	9.18069	0.0101494	0.0101494	ubiquitin associated protein 2 like	UBAP2L	9898	ENSG00000143569
ATP8B2	2808.7	0.799881	0.297016	9.37919	0.00919041	0.00919041	ATPase phospholipid transporting 8B2	ATP8B2	57198	ENSG00000143515
SHC1	5096.01	1.08699	0.328538	10.9655	0.00415782	0.00415782	SHC adaptor protein 1	SHC1	6464	ENSG00000160691
MSTO1	321.503	0.796573	0.273317	8.46633	0.0145064	0.0145064	misato mitochondrial distribution and morphology regulator 1	MSTO1	55154	ENSG00000125459
YY1AP1	971.606	0.665526	0.277213	7.02814	0.0297756	0.0297756	YY1 associated protein 1	YY1AP1	55249	ENSG00000163374
MRPL24	530.081	0.863593	0.340321	6.40389	0.0406829	0.0406829	mitochondrial ribosomal protein L24	MRPL24	79590	ENSG00000143314
PEAR1	341.212	3.96927	1.11891	11.0547	0.00397655	0.00397655	platelet endothelial aggregation receptor 1	PEAR1	375033	ENSG00000187800
CASQ1	37.8389	-1.954	0.768386	8.32654	0.0155566	0.0155566	calsequestrin 1	CASQ1	844	ENSG00000143318
LMX1A	68.1828	-11.4323	3.51556	7.18539	0.0275241	0.0275241	LIM homeobox transcription factor 1 alpha	LMX1A	4009	ENSG00000162761
CREG1	819.882	1.188	0.357817	11.1261	0.00383703	0.00383703	cellular repressor of E1A stimulated genes 1	CREG1	8804	ENSG00000143162
ATP1B1	2846.2	1.41369	0.500611	8.58236	0.0136887	0.0136887	ATPase Na+/K+ transporting subunit beta 1	ATP1B1	481	ENSG00000143153
NME7	439.02	0.757616	0.31872	6.52224	0.0383453	0.0383453	NME/NM23 family member 7	NME7	29922	ENSG00000143156
BLZF1	558.508	0.812792	0.243508	11.2639	0.00358165	0.00358165	basic leucine zipper nuclear factor 1	BLZF1	8548	ENSG00000117475
BX284613.2	13.1634	1.44018	1.12846	7.73072	0.0209553	0.0209553	NA	BX284613.2	NA	NA
KLHL20	576.239	1.03008	0.31125	10.8814	0.00433654	0.00433654	kelch like family member 20	KLHL20	27252	ENSG00000076321
ACBD6	1282.97	0.778993	0.29619	7.0556	0.0293695	0.0293695	acyl-CoA binding domain containing 6	ACBD6	84320	ENSG00000230124
NMNAT2	234.306	3.10346	1.2086	8.01289	0.0181979	0.0181979	nicotinamide nucleotide adenylyltransferase 2	NMNAT2	23057	ENSG00000157064
RPL5P5	21.1357	2.81556	1.18699	6.2417	0.0441196	0.0441196	ribosomal protein L5 pseudogene 5	RPL5P5	730213	NA
CDC73	1558.86	0.650574	0.233848	8.22495	0.0163672	0.0163672	cell division cycle 73	CDC73	79577	ENSG00000134371
CRB1	13.2056	2.27466	1.69092	7.27855	0.0262714	0.0262714	crumbs cell polarity complex component 1	CRB1	23418	ENSG00000134376
AL512306.3	4.65929	3.83888	1.61728	7.80657	0.0201755	0.0201755	NA	AL512306.3	NA	NA
LRRN2	955.311	3.18672	0.94057	13.0962	0.00143286	0.00143286	leucine rich repeat neuronal 2	LRRN2	10446	ENSG00000170382
AL512306.2	19.6585	3.27768	0.931797	12.5087	0.00192207	0.00192207	NA	AL512306.2	NA	NA
CNTN2	151.179	-5.0033	1.90714	7.24343	0.0267368	0.0267368	contactin 2	CNTN2	6900	ENSG00000184144
AL606753.2	13.535	3.21617	2.00294	7.61201	0.0222368	0.0222368	NA	AL606753.2	NA	NA
SPATA17	47.2593	-1.91033	0.68304	8.0162	0.0181679	0.0181679	spermatogenesis associated 17	SPATA17	128153	ENSG00000162814
TGFB2-AS1	2.49065	5.34352	2.08548	7.04491	0.0295269	0.0295269	TGFB2 antisense RNA 1 (head to head)	TGFB2-AS1	728463	ENSG00000232480
SLC30A10	96.5705	-3.43692	1.2436	7.95296	0.0187516	0.0187516	solute carrier family 30 member 10	SLC30A10	55532	ENSG00000196660
BPNT1	692.854	0.654487	0.232555	8.93623	0.0114689	0.0114689	3'(2'), 5'-bisphosphate nucleotidase 1	BPNT1	10380	ENSG00000162813
BROX	933.064	0.641282	0.246843	6.81703	0.0330903	0.0330903	BRO1 domain and CAAX motif containing	BROX	148362	ENSG00000162819
DISP1	334.476	0.522067	0.341919	6.9117	0.0315605	0.0315605	dispatched RND transporter family member 1	DISP1	84976	ENSG00000154309
FBXO28	1366.18	0.732563	0.271148	7.28326	0.0262095	0.0262095	F-box protein 28	FBXO28	23219	ENSG00000143756
SNAP47	1025.18	0.474456	0.250838	6.39977	0.040767	0.040767	synaptosome associated protein 47	SNAP47	116841	ENSG00000143740
WNT3A	64.3216	-5.74003	2.28462	6.37954	0.0411814	0.0411814	Wnt family member 3A	WNT3A	89780	ENSG00000154342
TAF5L	990.7	0.83028	0.297231	8.16586	0.016858	0.016858	TATA-box binding protein associated factor 5 like	TAF5L	27097	ENSG00000135801
NID1	5589.19	2.03631	0.679302	11.8293	0.00269967	0.00269967	nidogen 1	NID1	4811	ENSG00000116962
RYR2	269.191	2.70987	1.03641	10.2266	0.00601613	0.00601613	ryanodine receptor 2	RYR2	6262	ENSG00000198626
KIF28P	14.8539	1.73731	0.704532	6.3007	0.0428371	0.0428371	kinesin family member 28, pseudogene	KIF28P	100130097	NA
TRIM58	196.976	3.23044	1.01311	9.73751	0.00768294	0.00768294	tripartite motif containing 58	TRIM58	25893	ENSG00000162722
OR2W3	7.16536	2.7363	1.13971	6.14734	0.046251	0.046251	olfactory receptor family 2 subfamily W member 3	OR2W3	343171	ENSG00000238243
PGBD2	285.436	1.09005	0.430363	6.46942	0.0393717	0.0393717	piggyBac transposable element derived 2	PGBD2	267002	ENSG00000185220
SH3YL1	766.953	-0.802394	0.332866	6.06261	0.0482525	0.0482525	SH3 and SYLF domain containing 1	SH3YL1	26751	ENSG00000035115
SUCLA2P3	2.708	4.25365	2.37935	7.15524	0.0279421	0.0279421	succinate-CoA ligase ADP-forming beta subunit pseudogene 3	SUCLA2P3	100421648	NA
DTNB	520.533	-0.94248	0.425657	6.80269	0.0333283	0.0333283	dystrobrevin beta	DTNB	1838	ENSG00000138101
AC015977.1	24.4503	-0.206185	1.88012	6.52023	0.038384	0.038384	NA	AC015977.1	NA	NA
MAPRE3	277.35	1.3809	0.521524	7.67484	0.0215491	0.0215491	microtubule associated protein RP/EB family member 3	MAPRE3	22924	ENSG00000084764
QPCT	677.965	-1.18469	0.78984	6.51301	0.0385228	0.0385228	glutaminyl-peptide cyclotransferase	QPCT	25797	ENSG00000115828
AC019171.1	2.93798	4.09949	2.23399	6.10359	0.047274	0.047274	NA	AC019171.1	NA	NA
EPCAM-DT	55.435	-2.50059	0.954858	6.51748	0.0384368	0.0384368	EPCAM divergent transcript	EPCAM-DT	101927043	ENSG00000234690
AC073283.2	3.4796	-5.20006	2.04494	9.42919	0.00896348	0.00896348	NA	AC073283.2	NA	NA
BCL11A	425.48	2.00258	0.784738	6.41102	0.0405382	0.0405382	BAF chromatin remodeling complex subunit BCL11A	BCL11A	53335	ENSG00000119866
DCTN1	4644.44	0.508694	0.22586	6.41434	0.0404711	0.0404711	dynactin subunit 1	DCTN1	1639	ENSG00000204843
NEURL3	7.16726	-3.96061	1.69429	7.08932	0.0288785	0.0288785	neuralized E3 ubiquitin protein ligase 3	NEURL3	93082	ENSG00000163121
CHST10	617.608	0.558236	0.356938	6.52768	0.0382414	0.0382414	carbohydrate sulfotransferase 10	CHST10	9486	ENSG00000115526
AC012360.3	172.132	-0.613556	0.387962	6.71641	0.0347976	0.0347976	NA	AC012360.3	NA	NA
SLC5A7	15.6766	2.91946	1.77094	7.16192	0.027849	0.027849	solute carrier family 5 member 7	SLC5A7	60482	ENSG00000115665
MALL	6.99297	7.25657	2.39477	10.3793	0.0055739	0.0055739	mal, T cell differentiation protein like	MALL	7851	ENSG00000144063
AC108463.1	12.2823	3.52785	1.32065	7.11187	0.0285546	0.0285546	NA	AC108463.1	NA	NA
IL1A	102.164	-5.27968	1.31582	13.4283	0.0012136	0.0012136	interleukin 1 alpha	IL1A	3552	ENSG00000115008
MAP3K2-DT	77.2073	-1.73894	0.544178	20.3879	3.73966e-05	3.73966e-05	MAP3K2 divergent transcript	MAP3K2-DT	100506922	ENSG00000236682
MAP3K19	1.10672	-6.01918	2.58683	6.14557	0.0462921	0.0462921	mitogen-activated protein kinase kinase kinase 19	MAP3K19	80122	ENSG00000176601
KIF5C	2016.05	-2.0557	0.541106	13.7928	0.00101143	0.00101143	kinesin family member 5C	KIF5C	3800	ENSG00000168280
ITGB6	66.2009	-5.40596	1.5398	14.9732	0.000560533	0.000560533	integrin subunit beta 6	ITGB6	3694	ENSG00000115221
NOSTRIN	73.3401	-3.82602	1.48213	6.1405	0.0464096	0.0464096	nitric oxide synthase trafficking	NOSTRIN	115677	ENSG00000163072
HOXD12	14.8481	2.99782	2.66946	6.49166	0.0389362	0.0389362	homeobox D12	HOXD12	3238	ENSG00000170178
HOXD11	28.0448	-0.826902	1.94784	7.70669	0.0212086	0.0212086	homeobox D11	HOXD11	3237	ENSG00000128713
HOXD-AS2	13.0974	-1.27749	1.83349	6.35688	0.0416505	0.0416505	HOXD cluster antisense RNA 2	HOXD-AS2	100506783	NA
LINC01116	13.4243	2.1151	1.83863	7.55691	0.0228579	0.0228579	long intergenic non-protein coding RNA 1116	LINC01116	375295	NA
OSBPL6	502.16	-0.918192	0.398967	6.03283	0.0489764	0.0489764	oxysterol binding protein like 6	OSBPL6	114880	ENSG00000079156
ZNF804A	52.1205	2.45722	1.28897	9.24341	0.00983603	0.00983603	zinc finger protein 804A	ZNF804A	91752	ENSG00000170396
HECW2-AS1	18.5847	0.0540746	1.40237	12.1723	0.00227412	0.00227412	HECW2 antisense RNA 1	HECW2-AS1	101927482	NA
AOX1	134.807	-2.68872	0.886797	8.66454	0.0131377	0.0131377	aldehyde oxidase 1	AOX1	316	ENSG00000138356
MPP4	10.4024	0.617061	2.12034	6.55318	0.0377568	0.0377568	membrane palmitoylated protein 4	MPP4	58538	ENSG00000082126
LINC00607	172.585	-2.76265	0.866982	15.4073	0.000451187	0.000451187	long intergenic non-protein coding RNA 607	LINC00607	646324	ENSG00000235770
GPBAR1	78.8429	2.71087	1.10518	6.62231	0.0364741	0.0364741	G protein-coupled bile acid receptor 1	GPBAR1	151306	ENSG00000179921
DES	208.417	4.36758	1.02413	18.4979	9.62141e-05	9.62141e-05	desmin	DES	1674	ENSG00000175084
AC012512.1	17.5128	3.54224	1.35506	6.79813	0.0334045	0.0334045	NA	AC012512.1	NA	NA
AC074019.1	2.36552	1.02604	1.84261	8.25203	0.0161471	0.0161471	NA	AC074019.1	NA	NA
ALPI	33.109	-9.66252	3.34111	6.03908	0.0488237	0.0488237	alkaline phosphatase, intestinal	ALPI	248	ENSG00000163295
TRPM8	2.67491	-2.32582	2.06704	7.14063	0.028147	0.028147	transient receptor potential cation channel subfamily M member 8	TRPM8	79054	ENSG00000144481
LINC01266	7.39387	-5.56915	2.08368	7.51891	0.0232965	0.0232965	long intergenic non-protein coding RNA 1266	LINC01266	101927215	ENSG00000224957
SRGAP3	354.032	-2.26077	0.892965	6.99779	0.0302307	0.0302307	SLIT-ROBO Rho GTPase activating protein 3	SRGAP3	9901	ENSG00000196220
IL17RE	60.464	-1.97886	0.708931	7.76789	0.0205695	0.0205695	interleukin 17 receptor E	IL17RE	132014	ENSG00000163701
RFTN1	656.861	3.14589	1.086	7.47664	0.023794	0.023794	raftlin, lipid raft linker 1	RFTN1	23180	ENSG00000131378
LINC01980	118.275	-2.82895	1.02389	8.27804	0.0159385	0.0159385	long intergenic non-protein coding RNA 1980	LINC01980	105377007	ENSG00000225548
AC011816.2	3.63492	1.31685	1.41312	7.29383	0.0260715	0.0260715	NA	AC011816.2	NA	NA
AC104850.2	1.80508	3.69213	1.85011	6.62028	0.0365111	0.0365111	NA	AC104850.2	NA	NA
VIPR1	103.545	-2.03755	1.1293	6.09925	0.0473768	0.0473768	vasoactive intestinal peptide receptor 1	VIPR1	7433	ENSG00000114812
TMEM158	213.282	2.94041	1.06047	7.24232	0.0267516	0.0267516	transmembrane protein 158 (gene/pseudogene)	TMEM158	25907	ENSG00000249992
WDR6	4720.42	0.639447	0.232922	8.05591	0.0178107	0.0178107	WD repeat domain 6	WDR6	11180	ENSG00000178252
LAMB2	3981.62	1.03617	0.337906	9.39022	0.00913988	0.00913988	laminin subunit beta 2	LAMB2	3913	ENSG00000172037
STAB1	28.756	3.04335	1.182	7.17442	0.0276755	0.0276755	stabilin 1	STAB1	23166	ENSG00000010327
ARHGEF3	614.115	1.38776	0.580123	7.10508	0.0286518	0.0286518	Rho guanine nucleotide exchange factor 3	ARHGEF3	50650	ENSG00000163947
EOGT	848.518	1.37732	0.316585	19.0944	7.14024e-05	7.14024e-05	EGF domain specific O-linked N-acetylglucosamine transferase	EOGT	285203	ENSG00000163378
GBE1	580.832	1.16539	0.442612	7.20741	0.0272227	0.0272227	1,4-alpha-glucan branching enzyme 1	GBE1	2632	ENSG00000114480
CD96	7.80142	3.69415	1.20913	12.7718	0.00168517	0.00168517	CD96 molecule	CD96	10225	ENSG00000153283
C3orf52	194.248	-1.49195	0.534665	9.13784	0.0103692	0.0103692	chromosome 3 open reading frame 52	C3orf52	79669	ENSG00000114529
LSAMP-AS1	5.70916	1.86871	1.2356	6.51892	0.0384091	0.0384091	LSAMP antisense RNA 1	LSAMP-AS1	101926903	ENSG00000240922
SLC15A2	121.301	-2.37662	0.798752	8.46005	0.014552	0.014552	solute carrier family 15 member 2	SLC15A2	6565	ENSG00000163406
SEC22A	403.058	-0.75741	0.331572	7.46457	0.023938	0.023938	SEC22 homolog A, vesicle trafficking protein	SEC22A	26984	ENSG00000121542
PODXL2	636.762	1.3662	0.552159	7.50057	0.023511	0.023511	podocalyxin like 2	PODXL2	50512	ENSG00000114631
PLXND1	3210.52	1.86607	0.552097	11.0716	0.0039431	0.0039431	plexin D1	PLXND1	23129	ENSG00000004399
UBA5	1569.92	0.388576	0.167663	6.48623	0.0390421	0.0390421	ubiquitin like modifier activating enzyme 5	UBA5	79876	ENSG00000081307
MSL2	1107.14	-0.689264	0.286597	6.11767	0.0469424	0.0469424	MSL complex subunit 2	MSL2	55167	ENSG00000174579
LINC01210	15.426	2.99036	2.24298	6.23474	0.0442734	0.0442734	long intergenic non-protein coding RNA 1210	LINC01210	100507274	ENSG00000239513
AC007159.1	8.10952	4.36222	2.30852	9.57034	0.00835271	0.00835271	NA	AC007159.1	NA	NA
RASA2	978.817	-1.27442	0.489401	6.76269	0.0340017	0.0340017	RAS p21 protein activator 2	RASA2	5922	ENSG00000155903
AC107021.2	23.3762	1.42994	0.573372	6.24677	0.044008	0.044008	NA	AC107021.2	NA	NA
CP	97.3948	4.58843	1.46626	9.13176	0.0104007	0.0104007	ceruloplasmin	CP	1356	ENSG00000047457
LINC00886	32.6249	-2.29523	0.849818	7.26375	0.0264665	0.0264665	long intergenic non-protein coding RNA 886	LINC00886	730091	ENSG00000240875
IL12A-AS1	4.37011	3.84048	2.05537	6.35582	0.0416726	0.0416726	IL12A antisense RNA 1	IL12A-AS1	101928376	ENSG00000244040
SI	86.0406	2.59702	1.52338	13.3283	0.00127584	0.00127584	sucrase-isomaltase	SI	6476	ENSG00000090402
SLITRK3	313.711	5.82787	1.57028	11.0174	0.00405136	0.00405136	SLIT and NTRK like family member 3	SLITRK3	22865	ENSG00000121871
CLDN11	570.345	4.21425	1.21653	10.8236	0.00446368	0.00446368	claudin 11	CLDN11	5010	ENSG00000013297
SLC2A2	3.47916	-6.31912	2.34709	8.03859	0.0179657	0.0179657	solute carrier family 2 member 2	SLC2A2	6514	ENSG00000163581
LINC01208	35.8253	-3.86229	1.36754	7.46987	0.0238748	0.0238748	long intergenic non-protein coding RNA 1208	LINC01208	100505547	NA
USP13	1264.92	0.870005	0.347642	7.08285	0.028972	0.028972	ubiquitin specific peptidase 13	USP13	8975	ENSG00000058056
AC107294.1	2.34422	1.36112	1.82091	7.01781	0.0299296	0.0299296	NA	AC107294.1	NA	NA
MASP1	200.853	3.33051	1.19336	7.44799	0.0241373	0.0241373	mannan binding lectin serine peptidase 1	MASP1	5648	ENSG00000127241
OSTN	4.19911	-5.81232	2.15009	8.48601	0.0143643	0.0143643	osteocrin	OSTN	344901	ENSG00000188729
PLAAT1	44.5568	1.58104	0.639435	7.47496	0.0238141	0.0238141	phospholipase A and acyltransferase 1	PLAAT1	57110	ENSG00000127252
ATP13A4	135.822	-3.16672	1.20322	8.39531	0.0150308	0.0150308	ATPase 13A4	ATP13A4	84239	ENSG00000127249
LINC00884	98.5134	-2.10196	0.612258	11.6589	0.00293966	0.00293966	long intergenic non-protein coding RNA 884	LINC00884	401106	NA
AC108676.1	37.4497	-5.44816	1.70868	9.40059	0.0090926	0.0090926	NA	AC108676.1	NA	NA
PPP1R2	931.341	0.748713	0.284849	8.20423	0.0165376	0.0165376	protein phosphatase 1 regulatory inhibitor subunit 2	PPP1R2	5504	ENSG00000184203
SENP5	1672.78	-0.932636	0.332482	9.4834	0.00872379	0.00872379	SUMO specific peptidase 5	SENP5	205564	ENSG00000119231
ZNF732	331.297	-2.23775	0.769804	8.34819	0.0153891	0.0153891	zinc finger protein 732	ZNF732	654254	ENSG00000186777
SPON2	629.496	2.42639	0.932944	6.92277	0.0313863	0.0313863	spondin 2	SPON2	10417	ENSG00000159674
NOP14-AS1	263.024	0.641085	0.269128	7.73004	0.0209625	0.0209625	NOP14 antisense RNA 1	NOP14-AS1	317648	NA
HTRA3	131.797	2.43277	0.761287	10.1892	0.00612978	0.00612978	HtrA serine peptidase 3	HTRA3	94031	ENSG00000170801
LINC01182	3.09199	4.7392	2.02308	6.2356	0.0442545	0.0442545	long intergenic non-protein coding RNA 1182	LINC01182	101929071	ENSG00000250634
LDB2	929.678	3.30011	1.12308	9.71174	0.00778255	0.00778255	LIM domain binding 2	LDB2	9079	ENSG00000169744
LGI2	557.106	-3.15939	1.1195	7.02286	0.0298541	0.0298541	leucine rich repeat LGI family member 2	LGI2	55203	ENSG00000153012
SLC34A2	428.539	4.05195	1.46861	9.49447	0.00867566	0.00867566	solute carrier family 34 member 2	SLC34A2	10568	ENSG00000157765
PDS5A	4775.4	-0.613437	0.21591	8.49518	0.0142987	0.0142987	PDS5 cohesin associated factor A	PDS5A	23244	ENSG00000121892
AC095057.3	104.263	-0.714004	0.389338	7.00887	0.0300638	0.0300638	NA	AC095057.3	NA	NA
LNX1	184.217	-1.52386	0.591773	7.11131	0.0285626	0.0285626	ligand of numb-protein X 1	LNX1	84708	ENSG00000072201
UGT2A1	4.27694	3.86049	1.85929	6.08584	0.0476953	0.0476953	UDP glucuronosyltransferase family 2 member A1 complex locus	UGT2A1	10941	ENSG00000173610
ALB	1734.98	-8.0936	2.01365	13.7189	0.00104949	0.00104949	albumin	ALB	213	ENSG00000163631
AREG	43.6259	-4.76662	1.46217	13.4212	0.00121794	0.00121794	amphiregulin	AREG	374	ENSG00000109321
COQ2	374.281	0.0466099	0.255376	6.65066	0.0359606	0.0359606	coenzyme Q2, polyprenyltransferase	COQ2	27235	ENSG00000173085
TMSB4XP8	351.441	1.78091	0.733952	6.90887	0.0316052	0.0316052	TMSB4X pseudogene 8	TMSB4XP8	7117	NA
PMPCAP1	3.1814	3.71461	1.66465	6.33496	0.0421095	0.0421095	peptidase, mitochondrial processing alpha subunit pseudogene 1	PMPCAP1	133083	NA
ARHGEF38	11.291	-3.61089	1.35872	6.85708	0.0324343	0.0324343	Rho guanine nucleotide exchange factor 38	ARHGEF38	54848	ENSG00000236699
RPL34	11067.3	-0.216061	0.174947	6.59109	0.0370479	0.0370479	ribosomal protein L34	RPL34	6164	ENSG00000109475
MCUB	339.027	1.07783	0.618291	8.80691	0.012235	0.012235	mitochondrial calcium uniporter dominant negative beta subunit	MCUB	55013	ENSG00000005059
PCDH10	1932.4	2.12314	0.896606	6.82805	0.0329085	0.0329085	protocadherin 10	PCDH10	57575	ENSG00000138650
AC093903.1	9.43219	-5.13816	2.13669	6.3376	0.0420541	0.0420541	NA	AC093903.1	NA	NA
LINC02432	44.6882	-4.51804	1.2912	11.1937	0.00370959	0.00370959	long intergenic non-protein coding RNA 2432	LINC02432	100507639	ENSG00000248810
AC107223.1	47.9729	2.00266	1.12063	7.78431	0.0204014	0.0204014	NA	AC107223.1	NA	NA
GYPA	24.7004	4.01864	1.98216	7.11495	0.0285107	0.0285107	glycophorin A (MNS blood group)	GYPA	2993	ENSG00000170180
MAB21L2	299.31	1.07238	1.1642	6.6398	0.0361565	0.0361565	mab-21 like 2	MAB21L2	10586	ENSG00000181541
AC023424.2	8.32595	1.33437	1.53067	6.67587	0.0355102	0.0355102	NA	AC023424.2	NA	NA
FGB	11056.1	-7.01846	1.75963	13.5196	0.00115943	0.00115943	fibrinogen beta chain	FGB	2244	ENSG00000171564
FGG	1900.28	-6.03597	1.68815	12.2019	0.00224079	0.00224079	fibrinogen gamma chain	FGG	2266	ENSG00000171557
SPOCK3	314.933	-4.0475	1.35158	7.67838	0.021511	0.021511	SPARC (osteonectin), cwcv and kazal like domains proteoglycan 3	SPOCK3	50859	ENSG00000196104
PTGES3P3	7.48177	4.26564	1.60904	7.9519	0.0187615	0.0187615	prostaglandin E synthase 3 pseudogene 3	PTGES3P3	441050	NA
LINC02269	3.18693	2.20198	1.59886	6.6459	0.0360464	0.0360464	long intergenic non-protein coding RNA 2269	LINC02269	101928478	ENSG00000250708
FBXO8	266.593	0.827788	0.35913	7.05051	0.0294442	0.0294442	F-box protein 8	FBXO8	26269	ENSG00000164117
TAF11L11	9.44327	6.97491	2.30601	8.7723	0.0124486	0.0124486	TATA-box binding protein associated factor 11 like 11	TAF11L11	112488746	NA
TAF11L12	4.77062	7.23189	2.6962	7.51651	0.0233244	0.0233244	TATA-box binding protein associated factor 11 like 12	TAF11L12	112488739	NA
H3P21	5.95154	6.24344	2.63129	6.05559	0.0484223	0.0484223	H3 histone pseudogene 21	H3P21	391765	NA
AC114930.1	2.98372	5.28839	2.10347	7.0124	0.0300108	0.0300108	NA	AC114930.1	NA	NA
GHR	262.023	-2.30701	0.972461	7.56932	0.0227166	0.0227166	growth hormone receptor	GHR	2690	ENSG00000112964
ITGA1	1181.83	3.19055	1.03355	8.35882	0.0153075	0.0153075	integrin subunit alpha 1	ITGA1	3672	ENSG00000213949
AC025180.1	2.76152	5.20107	2.0397	6.74272	0.0343429	0.0343429	NA	AC025180.1	NA	NA
LINC01033	4.14851	3.97058	1.68279	10.9355	0.00422062	0.00422062	long intergenic non-protein coding RNA 1033	LINC01033	104355136	ENSG00000249069
SETD9	124.367	1.66499	0.494754	11.2855	0.00354308	0.00354308	SET domain containing 9	SETD9	133383	ENSG00000155542
RNF180	66.56	1.46086	0.545707	7.41308	0.0245623	0.0245623	ring finger protein 180	RNF180	285671	ENSG00000164197
AC113404.1	10.0423	0.0200091	1.07357	8.69095	0.0129653	0.0129653	NA	AC113404.1	NA	NA
THBS4	319.687	-2.08328	0.899802	6.1651	0.0458423	0.0458423	thrombospondin 4	THBS4	7060	ENSG00000113296
ADGRV1	1373.79	-0.624059	0.367889	8.66725	0.0131199	0.0131199	adhesion G protein-coupled receptor V1	ADGRV1	84059	ENSG00000164199
LUCAT1	41.37	-2.00939	0.962673	8.43202	0.0147574	0.0147574	lung cancer associated transcript 1	LUCAT1	100505994	ENSG00000248323
MTCYBP35	63.3618	5.27194	1.20754	31.1557	1.71642e-07	1.71642e-07	MT-CYB pseudogene 35	MTCYBP35	109729150	NA
AC118465.1	2.91856	4.78249	2.00101	7.99346	0.0183756	0.0183756	NA	AC118465.1	NA	NA
MARCHF3	225.826	1.49215	0.734849	7.74122	0.0208456	0.0208456	membrane associated ring-CH-type finger 3	MARCHF3	115123	ENSG00000173926
SLC12A2	986.904	-0.900454	0.300706	10.3806	0.00557026	0.00557026	solute carrier family 12 member 2	SLC12A2	6558	ENSG00000064651
C5orf66-AS1	11.5166	-5.88384	1.85363	11.4842	0.003208	0.003208	C5orf66 antisense RNA 1	C5orf66-AS1	101927953	ENSG00000249082
PCDHA7	54.2134	3.16442	1.15868	6.99628	0.0302536	0.0302536	protocadherin alpha 7	PCDHA7	56141	ENSG00000204963
PCDHA12	108.439	3.41672	1.03851	10.249	0.00594928	0.00594928	protocadherin alpha 12	PCDHA12	56137	ENSG00000251664
PCDHA13	14.0008	3.6484	1.35804	6.67903	0.0354541	0.0354541	protocadherin alpha 13	PCDHA13	56136	ENSG00000239389
PCDHAC1	105.887	4.71709	1.35845	10.3704	0.00559871	0.00559871	protocadherin alpha subfamily C, 1	PCDHAC1	56135	ENSG00000248383
PCDHAC2	212.703	5.33028	1.29113	15.6887	0.000391954	0.000391954	protocadherin alpha subfamily C, 2	PCDHAC2	56134	ENSG00000243232
PCDHGB5	198.839	2.07998	0.811062	6.1123	0.0470685	0.0470685	protocadherin gamma subfamily B, 5	PCDHGB5	56101	ENSG00000276547
PCDHGA11	136.79	3.46574	1.07074	10.2967	0.00580898	0.00580898	protocadherin gamma subfamily A, 11	PCDHGA11	56105	ENSG00000253873
ARHGAP26	1006.93	-1.82117	0.716926	7.43802	0.024258	0.024258	Rho GTPase activating protein 26	ARHGAP26	23092	ENSG00000145819
POU4F3	3.7074	-3.00306	1.50217	6.42437	0.0402686	0.0402686	POU class 4 homeobox 3	POU4F3	5459	ENSG00000091010
SH3TC2	29.4293	2.69669	1.17199	6.40256	0.04071	0.04071	SH3 domain and tetratricopeptide repeats 2	SH3TC2	79628	ENSG00000169247
PDGFRB	1472.82	3.22659	0.960571	11.3434	0.00344199	0.00344199	platelet derived growth factor receptor beta	PDGFRB	5159	ENSG00000113721
CAMK2A	43.9492	0.362394	0.798612	6.31831	0.0424616	0.0424616	calcium/calmodulin dependent protein kinase II alpha	CAMK2A	815	ENSG00000070808
SMIM3	249.981	1.13575	0.374833	19.7988	5.02054e-05	5.02054e-05	small integral membrane protein 3	SMIM3	85027	ENSG00000256235
HAND1	1772.58	2.44754	1.56584	6.89812	0.0317755	0.0317755	heart and neural crest derivatives expressed 1	HAND1	9421	ENSG00000113196
FAXDC2	271.788	-2.00555	0.770089	8.64682	0.0132546	0.0132546	fatty acid hydroxylase domain containing 2	FAXDC2	10826	ENSG00000170271
HAVCR1	50.0937	-4.42241	1.75596	7.82744	0.0199661	0.0199661	hepatitis A virus cellular receptor 1	HAVCR1	26762	ENSG00000113249
ATP10B	60.4703	-5.68335	1.5025	11.7741	0.00277511	0.00277511	ATPase phospholipid transporting 10B (putative)	ATP10B	23120	ENSG00000118322
AC113414.1	11.2396	-3.97145	1.50198	8.34502	0.0154135	0.0154135	NA	AC113414.1	NA	NA
BTNL9	40.4514	3.69136	1.24369	11.0907	0.0039056	0.0039056	butyrophilin like 9	BTNL9	153579	ENSG00000165810
PPP1R3G	17.4371	2.3257	1.01266	7.86432	0.0196013	0.0196013	protein phosphatase 1 regulatory subunit 3G	PPP1R3G	648791	ENSG00000219607
C6orf52	8.43524	-2.1499	0.907769	7.58621	0.0225255	0.0225255	chromosome 6 open reading frame 52	C6orf52	347744	ENSG00000137434
KIAA0319	46.3141	0.246596	1.16941	8.06711	0.0177113	0.0177113	KIAA0319	KIAA0319	9856	ENSG00000137261
AL133268.1	7.58843	-0.134013	0.994972	6.83684	0.0327642	0.0327642	NA	AL133268.1	NA	NA
H2AC8	16.4885	1.82378	0.830067	6.04886	0.0485855	0.0485855	H2A clustered histone 8	H2AC8	3012	ENSG00000277075
H4C6	2.40853	5.63874	2.17171	7.48522	0.0236922	0.0236922	H4 clustered histone 6	H4C6	8361	ENSG00000274618
BTN1A1	13.0563	-3.04665	0.886405	12.6035	0.00183306	0.00183306	butyrophilin subfamily 1 member A1	BTN1A1	696	ENSG00000124557
H2BC17	7.97937	2.93508	1.18574	7.73388	0.0209223	0.0209223	H2B clustered histone 17	H2BC17	8348	ENSG00000274641
HLA-A	532.874	1.55836	0.529745	8.50726	0.0142125	0.0142125	major histocompatibility complex, class I, A	HLA-A	3105	ENSG00000206503
MICA	67.9129	1.66042	0.629496	7.53779	0.0230775	0.0230775	MHC class I polypeptide-related sequence A	MICA	100507436	ENSG00000204520
GPSM3	34.5239	1.56625	0.605788	10.0073	0.00671345	0.00671345	G protein signaling modulator 3	GPSM3	63940	ENSG00000213654
HLA-DQB1	163.428	2.76944	1.33083	8.50875	0.014202	0.014202	major histocompatibility complex, class II, DQ beta 1	HLA-DQB1	3119	ENSG00000179344
COL11A2	383.8	-5.52325	1.26227	16.8114	0.000223584	0.000223584	collagen type XI alpha 2 chain	COL11A2	1302	ENSG00000204248
BAK1	878.931	-1.2464	0.532091	9.35002	0.00932544	0.00932544	BCL2 antagonist/killer 1	BAK1	578	ENSG00000030110
MAPK13	510.387	-2.27185	0.825344	8.28862	0.0158543	0.0158543	mitogen-activated protein kinase 13	MAPK13	5603	ENSG00000156711
BNIP5	13.9712	-5.65802	1.97778	7.25473	0.0265861	0.0265861	BCL2 interacting protein 5	BNIP5	389384	ENSG00000189325
KCNK5	686.66	-2.04928	0.816841	6.18679	0.0453478	0.0453478	potassium two pore domain channel subfamily K member 5	KCNK5	8645	ENSG00000164626
TFEB	93.6566	2.33931	0.842748	7.30334	0.0259477	0.0259477	transcription factor EB	TFEB	7942	ENSG00000112561
CCND3	894.84	1.22553	0.568547	8.09593	0.0174579	0.0174579	cyclin D3	CCND3	896	ENSG00000112576
RUNX2	166.482	2.95352	1.08646	7.15999	0.0278758	0.0278758	RUNX family transcription factor 2	RUNX2	860	ENSG00000124813
AL096865.1	7.61559	2.92435	1.2385	6.76893	0.0338958	0.0338958	NA	AL096865.1	NA	NA
PKHD1	149.004	-3.59536	1.33778	7.08352	0.0289624	0.0289624	PKHD1 ciliary IPT domain containing fibrocystin/polyductin	PKHD1	5314	ENSG00000170927
LGSN	28.5925	-4.93864	2.04141	6.94709	0.0310069	0.0310069	lengsin, lens protein with glutamine synthetase domain	LGSN	51557	ENSG00000146166
SH3BGRL2	1202.59	-1.12309	0.453971	6.05538	0.0484274	0.0484274	SH3 domain binding glutamate rich protein like 2	SH3BGRL2	83699	ENSG00000198478
GRIK2	48.561	2.15495	0.800252	7.18904	0.0274739	0.0274739	glutamate ionotropic receptor kainate type subunit 2	GRIK2	2898	ENSG00000164418
FYN	1947.42	-1.06089	0.304044	12.3144	0.00211822	0.00211822	FYN proto-oncogene, Src family tyrosine kinase	FYN	2534	ENSG00000010810
CCN6	4.50617	-3.97042	1.6989	6.75552	0.0341237	0.0341237	cellular communication network factor 6	CCN6	8838	ENSG00000112761
EPB41L2	5147.23	-0.750559	0.313047	6.86074	0.032375	0.032375	erythrocyte membrane protein band 4.1 like 2	EPB41L2	2037	ENSG00000079819
EYA4	85.9805	-2.55413	1.37938	7.9267	0.0189994	0.0189994	EYA transcriptional coactivator and phosphatase 4	EYA4	2070	ENSG00000112319
TCF21	76.9603	5.89673	1.50927	15.0989	0.000526411	0.000526411	transcription factor 21	TCF21	6943	ENSG00000118526
WAKMAR2	26.0677	2.51294	1.01618	7.23913	0.0267943	0.0267943	wound and keratinocyte migration associated lncRNA 2	WAKMAR2	100130476	ENSG00000237499
HEBP2	1365.46	-0.822686	0.302056	7.39369	0.0248016	0.0248016	heme binding protein 2	HEBP2	23593	ENSG00000051620
AL035446.1	3.36984	-3.48809	1.61051	6.97014	0.0306516	0.0306516	NA	AL035446.1	NA	NA
ADGRG6	1344.14	-2.0316	1.17986	7.86253	0.0196189	0.0196189	adhesion G protein-coupled receptor G6	ADGRG6	57211	ENSG00000112414
AL031320.2	14.9559	0.157533	0.619131	7.04349	0.0295479	0.0295479	NA	AL031320.2	NA	NA
PHACTR2	2181.76	1.52345	0.48225	10.5337	0.00515991	0.00515991	phosphatase and actin regulator 2	PHACTR2	9749	ENSG00000112419
AKAP12	7365.51	1.79492	0.667284	8.40388	0.0149665	0.0149665	A-kinase anchoring protein 12	AKAP12	9590	ENSG00000131016
PDCD2	2205.8	-0.54449	0.298901	6.18333	0.0454262	0.0454262	programmed cell death 2	PDCD2	5134	ENSG00000071994
COX19	618.072	-0.63582	0.243657	9.95553	0.00688943	0.00688943	cytochrome c oxidase assembly factor COX19	COX19	90639	ENSG00000240230
AC004982.1	14.6467	-3.13601	1.22762	6.06536	0.0481862	0.0481862	NA	AC004982.1	NA	NA
AC004982.2	36.765	-2.78095	0.962193	7.83675	0.0198734	0.0198734	NA	AC004982.2	NA	NA
UMAD1	260.74	0.35063	0.276855	6.85191	0.0325182	0.0325182	UBAP1-MVB12-associated (UMA) domain containing 1	UMAD1	729852	ENSG00000219545
DNAH11	157.245	2.30116	0.910381	6.67176	0.0355832	0.0355832	dynein axonemal heavy chain 11	DNAH11	8701	ENSG00000105877
RAPGEF5	559.268	-1.76046	0.589929	8.7354	0.0126804	0.0126804	Rap guanine nucleotide exchange factor 5	RAPGEF5	9771	ENSG00000136237
AC004485.1	5.26916	7.22886	2.69316	6.85184	0.0325193	0.0325193	NA	AC004485.1	NA	NA
PRR15	411.683	-2.13936	0.911517	6.45157	0.0397245	0.0397245	proline rich 15	PRR15	222171	ENSG00000176532
DPY19L2P3	53.9589	2.30965	0.767052	9.15749	0.0102678	0.0102678	DPY19L2 pseudogene 3	DPY19L2P3	442524	ENSG00000227855
SCRN1	6310.09	0.808776	0.352026	6.06316	0.0482393	0.0482393	secernin 1	SCRN1	9805	ENSG00000136193
SEPTIN7	6176.22	0.683051	0.293878	7.08366	0.0289603	0.0289603	septin 7	SEPTIN7	989	ENSG00000122545
SEPTIN7P3	73.3157	-2.5021	1.37185	7.51049	0.0233947	0.0233947	septin 7 pseudogene 3	SEPTIN7P3	646913	NA
TUBG1P	4.07577	3.044	1.6045	6.46892	0.0393815	0.0393815	tubulin gamma 1 pseudogene	TUBG1P	442673	NA
GCK	85.9914	2.82542	1.11204	7.31601	0.0257839	0.0257839	glucokinase	GCK	2645	ENSG00000106633
NPC1L1	138.594	-3.8049	1.67334	6.54118	0.037984	0.037984	NPC1 like intracellular cholesterol transporter 1	NPC1L1	29881	ENSG00000015520
DDC	159.618	-4.39092	1.19993	11.436	0.0032863	0.0032863	dopa decarboxylase	DDC	1644	ENSG00000132437
ZNF736	417.698	-2.92909	1.19017	7.1629	0.0278353	0.0278353	zinc finger protein 736	ZNF736	728927	ENSG00000234444
AC073270.2	3.96001	-3.5291	1.77246	6.13809	0.0464656	0.0464656	NA	AC073270.2	NA	NA
SPDYE21P	3.69244	2.7285	1.27179	6.57694	0.0373108	0.0373108	speedy/RINGO cell cycle regulator family member E21, pseudogene	SPDYE21P	442572	NA
PMS2P10	1.60731	-3.60397	1.99539	6.09517	0.0474735	0.0474735	PMS1 homolog 2, mismatch repair system component pseudogene 10	PMS2P10	100288713	NA
GTF2IP7	3.82057	-4.005	1.77172	6.15726	0.0460224	0.0460224	general transcription factor IIi pseudogene 7	GTF2IP7	101927126	NA
UPK3B	16.0361	4.91718	1.71	9.08085	0.0106689	0.0106689	uroplakin 3B	UPK3B	105375355	ENSG00000243566
SEMA3D	577.057	-1.83318	0.699307	14.9375	0.000570631	0.000570631	semaphorin 3D	SEMA3D	223117	ENSG00000153993
TP53TG1	156.382	-1.45726	0.542421	10.0132	0.00669354	0.00669354	TP53 target 1	TP53TG1	11257	NA
CROT	548.113	-1.80995	0.521527	12.7757	0.00168186	0.00168186	carnitine O-octanoyltransferase	CROT	54677	ENSG00000005469
FAM237B	3.69133	4.59604	3.10769	6.6947	0.0351775	0.0351775	family with sequence similarity 237 member B	FAM237B	107986818	NA
AC079760.2	2.98625	-2.43142	1.6973	9.52686	0.00853627	0.00853627	NA	AC079760.2	NA	NA
DLX6-AS1	170.09	-4.86358	2.14194	7.251	0.0266358	0.0266358	DLX6 antisense RNA 1	DLX6-AS1	285987	NA
MYH16	3.43125	-3.25326	1.6769	6.93244	0.0312349	0.0312349	myosin heavy chain 16 pseudogene	MYH16	84176	NA
LRCH4	392.276	0.914812	0.294373	9.93863	0.00694791	0.00694791	leucine rich repeats and calponin homology domain containing 4	LRCH4	4034	ENSG00000077454
SRRT	3992.04	0.390938	0.247936	6.31959	0.0424344	0.0424344	serrate, RNA effector molecule	SRRT	51593	ENSG00000087087
LAMB4	30.0115	-4.17543	1.87263	6.98987	0.0303507	0.0303507	laminin subunit beta 4	LAMB4	22798	ENSG00000091128
NRCAM	857.027	-0.0522748	1.06774	7.33011	0.0256027	0.0256027	neuronal cell adhesion molecule	NRCAM	4897	ENSG00000091129
TMEM229A	53.5949	0.16407	1.32208	6.45937	0.03957	0.03957	transmembrane protein 229A	TMEM229A	730130	ENSG00000234224
STRIP2	294.122	0.709958	0.344635	11.0192	0.00404763	0.00404763	striatin interacting protein 2	STRIP2	57464	ENSG00000128578
CPA4	173.778	-1.73262	2.06255	6.47382	0.0392851	0.0392851	carboxypeptidase A4	CPA4	51200	ENSG00000128510
CPA1	28.1294	2.13384	1.27999	8.42904	0.0147794	0.0147794	carboxypeptidase A1	CPA1	1357	ENSG00000091704
KLF14	6.29418	2.69885	1.37215	11.5572	0.00309302	0.00309302	Kruppel like factor 14	KLF14	136259	ENSG00000266265
CNOT4	657.52	0.452743	0.136273	11.8293	0.0026996	0.0026996	CCR4-NOT transcription complex subunit 4	CNOT4	4850	ENSG00000080802
SLC13A4	189.136	-1.7596	0.737196	8.21838	0.0164211	0.0164211	solute carrier family 13 member 4	SLC13A4	26266	ENSG00000164707
CHRM2	31.5005	3.49454	1.70758	9.53758	0.00849064	0.00849064	cholinergic receptor muscarinic 2	CHRM2	1129	ENSG00000181072
DGKI	92.4706	1.38122	0.993766	6.02684	0.0491234	0.0491234	diacylglycerol kinase iota	DGKI	9162	ENSG00000157680
PTMAP10	4.12912	3.308	1.28704	6.9012	0.0317265	0.0317265	prothymosin alpha pseudogene 10	PTMAP10	442727	NA
TRPV6	28.5096	-3.96981	1.43019	6.61875	0.036539	0.036539	transient receptor potential cation channel subfamily V member 6	TRPV6	55503	ENSG00000165125
RNY1	5.60863	2.71552	1.16497	8.76517	0.012493	0.012493	RNA, Ro60-associated Y1	RNY1	6084	ENSG00000201098
RPL23AP53	61.4883	1.25128	0.552075	6.51833	0.0384206	0.0384206	ribosomal protein L23a pseudogene 53	RPL23AP53	644128	NA
FAM87A	5.08249	2.65785	1.39311	7.03335	0.029698	0.029698	family with sequence similarity 87 member A	FAM87A	157693	ENSG00000182366
AC018398.1	37.7491	-6.27818	1.87525	11.2593	0.00358975	0.00358975	NA	AC018398.1	NA	NA
ADAM28	122.88	-3.00888	1.2066	6.18912	0.045295	0.045295	ADAM metallopeptidase domain 28	ADAM28	10863	ENSG00000042980
MTCYBP19	13.3511	4.70824	1.86948	9.70194	0.0078208	0.0078208	MT-CYB pseudogene 19	MTCYBP19	107075127	NA
PLAT	1295.33	4.1079	1.32476	9.18922	0.0101062	0.0101062	plasminogen activator, tissue type	PLAT	5327	ENSG00000104368
RPL29P19	16.5408	2.43186	1.00443	6.65945	0.035803	0.035803	ribosomal protein L29 pseudogene 19	RPL29P19	389655	NA
AC120042.1	1.44152	4.91887	2.59015	6.99	0.0303487	0.0303487	NA	AC120042.1	NA	NA
PKIA	661.145	2.04631	0.792277	6.49877	0.038798	0.038798	cAMP-dependent protein kinase inhibitor alpha	PKIA	5569	ENSG00000171033
AC068700.1	11.7438	2.90404	1.08342	9.16151	0.0102471	0.0102471	NA	AC068700.1	NA	NA
SLC2A3P4	8.07147	-3.90196	1.40801	8.82713	0.0121119	0.0121119	solute carrier family 2 member 3 pseudogene 4	SLC2A3P4	399495	NA
SLC26A7	49.4947	-2.42288	1.07607	6.04588	0.0486579	0.0486579	solute carrier family 26 member 7	SLC26A7	115111	ENSG00000147606
RUNX1T1	584.789	1.78055	0.741348	7.38244	0.0249415	0.0249415	RUNX1 partner transcriptional co-repressor 1	RUNX1T1	862	ENSG00000079102
CDH17	315.143	-5.37394	1.57451	11.3896	0.00336342	0.00336342	cadherin 17	CDH17	1015	ENSG00000079112
GDF6	148.618	0.772271	1.15713	6.48011	0.0391618	0.0391618	growth differentiation factor 6	GDF6	392255	ENSG00000156466
STK3	764.665	-0.836755	0.341685	6.00971	0.049546	0.049546	serine/threonine kinase 3	STK3	6788	ENSG00000104375
OSR2	156.784	-2.61316	0.780798	11.0437	0.00399842	0.00399842	odd-skipped related transciption factor 2	OSR2	116039	ENSG00000164920
MTCO1P4	104.58	1.09615	1.44844	6.20275	0.0449874	0.0449874	MT-CO1 pseudogene 4	MTCO1P4	106480684	NA
ZFPM2	251.728	2.71137	1.06057	6.65655	0.035855	0.035855	zinc finger protein, FOG family member 2	ZFPM2	23414	ENSG00000169946
ANGPT1	557.577	2.91698	1.01121	8.56509	0.0138075	0.0138075	angiopoietin 1	ANGPT1	284	ENSG00000154188
AC104958.2	16.0201	-5.79116	1.5584	13.079	0.00144518	0.00144518	NA	AC104958.2	NA	NA
FBXO32	83.2137	3.40363	1.20793	7.00424	0.0301335	0.0301335	F-box protein 32	FBXO32	114907	ENSG00000156804
TRIB1	993.872	-2.08731	0.619631	10.7484	0.00463451	0.00463451	tribbles pseudokinase 1	TRIB1	10221	ENSG00000173334
SLA	46.8314	4.93464	1.38611	12.049	0.0024187	0.0024187	Src like adaptor	SLA	6503	ENSG00000155926
ARC	263.96	4.12116	1.49037	6.86132	0.0323656	0.0323656	activity regulated cytoskeleton associated protein	ARC	23237	ENSG00000198576
MINCR	52.1199	-1.14152	0.460563	6.49373	0.0388959	0.0388959	MYC-induced long non-coding RNA	MINCR	100507316	ENSG00000253716
ZNF252P-AS1	8.45293	-0.477975	0.889905	6.26538	0.0436004	0.0436004	ZNF252P antisense RNA 1	ZNF252P-AS1	286103	ENSG00000255559
KCNV2	42.962	-5.30916	1.42588	13.7042	0.00105723	0.00105723	potassium voltage-gated channel modifier subfamily V member 2	KCNV2	169522	ENSG00000168263
PTPRD	2202.08	-1.07316	0.448976	6.14163	0.0463834	0.0463834	protein tyrosine phosphatase receptor type D	PTPRD	5789	ENSG00000153707
PTPRD-AS1	34.0935	-1.31472	0.569071	6.95469	0.0308893	0.0308893	PTPRD antisense RNA 1	PTPRD-AS1	101929407	ENSG00000225706
LURAP1L-AS1	6.27645	3.93225	1.48921	10.1704	0.00618775	0.00618775	LURAP1L antisense RNA 1	LURAP1L-AS1	101929467	ENSG00000235448
AL159169.2	15.0796	-3.4899	1.19878	9.71195	0.00778174	0.00778174	NA	AL159169.2	NA	NA
ZDHHC21	1025.39	-0.863936	0.27954	10.0021	0.00673093	0.00673093	zinc finger DHHC-type containing 21	ZDHHC21	340481	ENSG00000175893
AL591222.1	4.11031	4.0081	1.53623	7.15141	0.0279956	0.0279956	NA	AL591222.1	NA	NA
ERVFRD-3	5.62912	3.24713	1.19564	7.89198	0.019332	0.019332	endogenous retrovirus group FRD member 3	ERVFRD-3	100533725	NA
TEK	1259.82	3.94949	1.19166	10.207	0.00607545	0.00607545	TEK receptor tyrosine kinase	TEK	7010	ENSG00000120156
RPS26P2	33.5126	2.4654	1.31535	7.85699	0.0196732	0.0196732	ribosomal protein S26 pseudogene 2	RPS26P2	646753	NA
AQP7	36.9694	-4.61033	1.81331	6.64185	0.0361195	0.0361195	aquaporin 7	AQP7	364	ENSG00000165269
PAX5	8.27774	-4.66669	1.84174	6.93125	0.0312534	0.0312534	paired box 5	PAX5	5079	ENSG00000196092
BMS1P10	14.4963	-2.06546	0.983443	11.002	0.0040827	0.0040827	BMS1 pseudogene 10	BMS1P10	728611	NA
CR786580.1	3.48674	6.31549	2.07311	10.5359	0.00515406	0.00515406	NA	CR786580.1	NA	NA
NTRK2	274.264	-2.71979	1.26025	11.2582	0.00359172	0.00359172	neurotrophic receptor tyrosine kinase 2	NTRK2	4915	ENSG00000148053
ASPN	190.887	-2.74401	1.23527	7.13398	0.0282407	0.0282407	asporin	ASPN	54829	ENSG00000106819
SVEP1	2233.7	4.26183	1.26846	10.3123	0.00576394	0.00576394	sushi, von Willebrand factor type A, EGF and pentraxin domain containing 1	SVEP1	79987	ENSG00000165124
AL592463.1	4.02568	3.62958	1.82713	7.30346	0.0259462	0.0259462	NA	AL592463.1	NA	NA
FKBP15	1030.06	0.778574	0.261596	8.9556	0.0113584	0.0113584	FKBP prolyl isomerase 15	FKBP15	23307	ENSG00000119321
SLC31A1	2320.47	0.665993	0.390463	6.55334	0.0377537	0.0377537	solute carrier family 31 member 1	SLC31A1	1317	ENSG00000136868
C5	874.151	-3.76269	1.72974	6.80137	0.0333504	0.0333504	complement C5	C5	727	ENSG00000106804
CNTRL	875.207	-1.05589	0.455464	7.33494	0.0255409	0.0255409	centriolin	CNTRL	11064	ENSG00000119397
LHX2	89.0832	5.96037	2.2327	9.78805	0.00749119	0.00749119	LIM homeobox 2	LHX2	9355	ENSG00000106689
PRPS1P2	35.2946	0.530891	0.519229	7.02445	0.0298305	0.0298305	phosphoribosyl pyrophosphate synthetase 1 pseudogene 2	PRPS1P2	100421295	NA
FNBP1	1466.81	0.673572	0.239947	9.30361	0.00954434	0.00954434	formin binding protein 1	FNBP1	23048	ENSG00000187239
FAM78A	107.973	2.66674	0.92251	8.69235	0.0129563	0.0129563	family with sequence similarity 78 member A	FAM78A	286336	ENSG00000126882
ADAMTS13	178.089	2.47382	0.928522	8.37368	0.0151942	0.0151942	ADAM metallopeptidase with thrombospondin type 1 motif 13	ADAMTS13	11093	ENSG00000160323
LINC02649	11.1312	-2.08233	1.09057	7.87094	0.0195365	0.0195365	long intergenic non-protein coding RNA 2649	LINC02649	399715	ENSG00000215244
HSP90AB7P	4.41596	2.32896	1.2839	6.29663	0.0429245	0.0429245	heat shock protein 90 alpha family class B member 7, pseudogene	HSP90AB7P	644495	NA
CCDC3	222.399	3.11091	0.691953	20.6857	3.22216e-05	3.22216e-05	coiled-coil domain containing 3	CCDC3	83643	ENSG00000151468
ENKUR	12.4063	-3.0788	1.36582	12.3946	0.00203493	0.00203493	enkurin, TRPC channel interacting protein	ENKUR	219670	ENSG00000151023
C1DP1	14.2881	-2.86928	1.68853	7.58558	0.0225327	0.0225327	C1D nuclear receptor corepressor pseudogene 1	C1DP1	554049	NA
CCNYL2	14.3833	4.8488	1.81118	7.2682	0.0264077	0.0264077	cyclin Y like 2 (pseudogene)	CCNYL2	414194	ENSG00000182632
LINC00839	191.073	4.1477	1.2483	9.7403	0.0076722	0.0076722	long intergenic non-protein coding RNA 839	LINC00839	84856	ENSG00000185904
LINC02633	1.31969	-1.72805	2.85066	7.08037	0.029008	0.029008	long intergenic non-protein coding RNA 2633	LINC02633	105378270	NA
CXCL12	1210.88	2.6935	1.01967	7.46398	0.0239451	0.0239451	C-X-C motif chemokine ligand 12	CXCL12	6387	ENSG00000107562
RBP3	4.78134	3.72293	1.68319	9.17509	0.0101778	0.0101778	retinol binding protein 3	RBP3	5949	ENSG00000265203
ARHGAP22	180.636	2.99774	0.614997	23.0359	9.9498e-06	9.9498e-06	Rho GTPase activating protein 22	ARHGAP22	58504	ENSG00000128805
PCDH15	240.036	3.09316	0.834823	16.0281	0.000330779	0.000330779	protocadherin related 15	PCDH15	65217	ENSG00000150275
PHYHIPL	21.7828	-2.88043	1.58381	9.0346	0.0109185	0.0109185	phytanoyl-CoA 2-hydroxylase interacting protein like	PHYHIPL	84457	ENSG00000165443
AC022387.2	13.1166	3.36916	1.36015	8.15455	0.0169536	0.0169536	NA	AC022387.2	NA	NA
MRPL35P2	11.124	5.44453	1.82658	10.9943	0.00409834	0.00409834	mitochondrial ribosomal protein L35 pseudogene 2	MRPL35P2	359743	NA
LINC02671	4.83423	-4.62853	1.63282	9.35278	0.00931257	0.00931257	long intergenic non-protein coding RNA 2671	LINC02671	101928887	ENSG00000224714
LINC02636	5.73488	-4.18192	1.26918	15.2291	0.000493225	0.000493225	long intergenic non-protein coding RNA 2636	LINC02636	102723350	NA
LINC00857	31.1193	-1.95058	0.8963	6.87468	0.03215	0.03215	long intergenic non-protein coding RNA 857	LINC00857	439990	ENSG00000237523
LIPA	1323.87	0.622472	0.514875	8.62724	0.013385	0.013385	lipase A, lysosomal acid type	LIPA	3988	ENSG00000107798
SLC16A12	49.3093	-2.87219	1.35626	6.21441	0.0447258	0.0447258	solute carrier family 16 member 12	SLC16A12	387700	ENSG00000152779
HTR7	272.695	4.79535	1.59828	7.24563	0.0267074	0.0267074	5-hydroxytryptamine receptor 7	HTR7	3363	ENSG00000148680
SLIT1	227.624	-3.03419	1.43893	6.549	0.0378357	0.0378357	slit guidance ligand 1	SLIT1	6585	ENSG00000187122
NKX2-3	40.6238	4.00289	2.21149	9.15055	0.0103035	0.0103035	NK2 homeobox 3	NKX2-3	159296	ENSG00000119919
CPN1	170.915	-7.73711	2.37502	7.85671	0.019676	0.019676	carboxypeptidase N subunit 1	CPN1	1369	ENSG00000120054
PSD	206.59	2.30194	0.972437	6.36757	0.0414285	0.0414285	pleckstrin and Sec7 domain containing	PSD	5662	ENSG00000059915
SORCS1	366.45	-2.94332	1.09354	6.35585	0.041672	0.041672	sortilin related VPS10 domain containing receptor 1	SORCS1	114815	ENSG00000108018
LINC01435	3.70825	-4.65578	1.94364	8.95582	0.0113571	0.0113571	long intergenic non-protein coding RNA 1435	LINC01435	103695365	ENSG00000229981
GPAM	1166.87	-0.756329	0.285167	7.03725	0.0296402	0.0296402	glycerol-3-phosphate acyltransferase, mitochondrial	GPAM	57678	ENSG00000119927
ACSL5	34.7667	-4.00451	1.49119	7.7003	0.0212765	0.0212765	acyl-CoA synthetase long chain family member 5	ACSL5	51703	ENSG00000197142
MGMT	429.154	-0.194591	0.365368	7.06373	0.0292503	0.0292503	O-6-methylguanine-DNA methyltransferase	MGMT	4255	ENSG00000170430
TCERG1L	39.5164	-5.5595	2.65312	6.82143	0.0330176	0.0330176	transcription elongation regulator 1 like	TCERG1L	256536	ENSG00000176769
IFITM2	1846.67	1.60161	0.56659	12.2054	0.00223683	0.00223683	interferon induced transmembrane protein 2	IFITM2	10581	ENSG00000185201
LSP1	20.6965	5.35186	1.79325	7.74373	0.0208195	0.0208195	lymphocyte specific protein 1	LSP1	4046	ENSG00000130592
CDKN1C	260.361	1.62259	0.619049	9.73725	0.00768393	0.00768393	cyclin dependent kinase inhibitor 1C	CDKN1C	1028	ENSG00000129757
SLC22A18	90.3192	-2.00725	0.748074	7.09402	0.0288106	0.0288106	solute carrier family 22 member 18	SLC22A18	5002	ENSG00000110628
OR52K3P	6.66845	3.87898	1.55376	10.8581	0.00438724	0.00438724	olfactory receptor family 52 subfamily K member 3 pseudogene	OR52K3P	390035	NA
SYT9	32.7182	-3.60362	1.33895	7.81517	0.020089	0.020089	synaptotagmin 9	SYT9	143425	ENSG00000170743
OLFML1	117.321	2.22177	1.00629	9.03314	0.0109264	0.0109264	olfactomedin like 1	OLFML1	283298	ENSG00000183801
AC087379.1	5.51542	-8.29662	2.47831	10.7435	0.00464594	0.00464594	NA	AC087379.1	NA	NA
SLC5A12	612.209	2.54026	0.964473	14.8561	0.000594331	0.000594331	solute carrier family 5 member 12	SLC5A12	159963	ENSG00000148942
WT1	33.3423	6.06474	1.49438	14.6126	0.000671309	0.000671309	WT1 transcription factor	WT1	7490	ENSG00000184937
KIAA1549L	127.606	1.50583	0.999566	9.77095	0.00755555	0.00755555	KIAA1549 like	KIAA1549L	25758	ENSG00000110427
CHST1	89.4033	3.13827	1.09032	7.86356	0.0196087	0.0196087	carbohydrate sulfotransferase 1	CHST1	8534	ENSG00000175264
SPI1	3.08998	5.50762	2.22473	6.47883	0.0391869	0.0391869	Spi-1 proto-oncogene	SPI1	6688	ENSG00000066336
TRIM49B	9.27992	8.1311	2.65883	8.10427	0.0173852	0.0173852	tripartite motif containing 49B	TRIM49B	283116	ENSG00000182053
GLYATL2	46.4481	-5.96081	1.89526	9.55417	0.00842049	0.00842049	glycine-N-acyltransferase like 2	GLYATL2	219970	ENSG00000156689
TCN1	123.713	-5.36606	2.60673	7.95274	0.0187536	0.0187536	transcobalamin 1	TCN1	6947	ENSG00000134827
PTGDR2	6.93081	2.38381	1.017	6.1828	0.0454384	0.0454384	prostaglandin D2 receptor 2	PTGDR2	11251	ENSG00000183134
RAB3IL1	386.224	0.3387	0.533672	6.28089	0.0432636	0.0432636	RAB3A interacting protein like 1	RAB3IL1	5866	ENSG00000167994
ATG2A	895.888	0.877131	0.212102	17.7316	0.000141136	0.000141136	autophagy related 2A	ATG2A	23130	ENSG00000110046
CD248	642.521	3.57156	1.22949	8.91539	0.0115891	0.0115891	CD248 molecule	CD248	57124	ENSG00000174807
RIN1	124.637	2.57805	0.685553	13.565	0.00113346	0.00113346	Ras and Rab interactor 1	RIN1	9610	ENSG00000174791
SPTBN2	2067.5	1.54456	0.545978	7.905	0.0192066	0.0192066	spectrin beta, non-erythrocytic 2	SPTBN2	6712	ENSG00000173898
TBX10	84.3165	3.59125	1.24384	9.40778	0.00905997	0.00905997	T-box transcription factor 10	TBX10	347853	ENSG00000167800
LINC02701	43.8553	-3.07272	1.01418	8.92832	0.0115144	0.0115144	long intergenic non-protein coding RNA 2701	LINC02701	105369364	ENSG00000250508
RNF169	720.05	-1.08943	0.430439	6.65779	0.0358328	0.0358328	ring finger protein 169	RNF169	254225	ENSG00000166439
AP001189.1	18.5769	4.6729	1.69253	6.74481	0.034307	0.034307	NA	AP001189.1	NA	NA
LRRC32	855.595	3.19259	1.13502	8.29333	0.0158171	0.0158171	leucine rich repeat containing 32	LRRC32	2615	ENSG00000137507
RAB30	376.736	0.709097	0.356239	6.02301	0.0492176	0.0492176	RAB30, member RAS oncogene family	RAB30	27314	ENSG00000137502
AP001528.1	76.7069	-2.1495	0.841786	6.45878	0.0395816	0.0395816	NA	AP001528.1	NA	NA
ENDOD1	559.328	2.49126	0.863505	8.29432	0.0158093	0.0158093	endonuclease domain containing 1	ENDOD1	23052	ENSG00000149218
MMP1	109.959	0.4472	2.00957	7.46097	0.0239812	0.0239812	matrix metallopeptidase 1	MMP1	4312	ENSG00000196611
GUCY1A2	318.584	0.865631	1.13137	6.25595	0.0438064	0.0438064	guanylate cyclase 1 soluble subunit alpha 2	GUCY1A2	2977	ENSG00000152402
COLCA1	16.2562	-4.8194	1.49859	11.2082	0.00368279	0.00368279	colorectal cancer associated 1	COLCA1	399948	ENSG00000196167
COLCA2	14.5642	-4.43887	1.51032	8.98556	0.0111895	0.0111895	colorectal cancer associated 2	COLCA2	120376	ENSG00000214290
BCO2	126.407	2.39192	0.742539	14.5086	0.000707124	0.000707124	beta-carotene oxygenase 2	BCO2	83875	ENSG00000197580
DRD2	170.168	-3.07444	1.44924	7.08101	0.0289986	0.0289986	dopamine receptor D2	DRD2	1813	ENSG00000149295
LINC00900	12.8317	-2.10497	0.83767	7.7434	0.020823	0.020823	long intergenic non-protein coding RNA 900	LINC00900	283143	NA
MPZL2	154.168	-4.5339	1.38894	9.48632	0.0087111	0.0087111	myelin protein zero like 2	MPZL2	10205	ENSG00000149573
CD3E	5.80076	-1.78522	2.53632	10.1385	0.00628727	0.00628727	CD3e molecule	CD3E	916	ENSG00000198851
BCL9L	2327.91	0.655615	0.280359	7.33086	0.0255931	0.0255931	BCL9 like	BCL9L	283149	ENSG00000186174
ETS1	2242.51	2.26674	0.880483	6.59031	0.0370623	0.0370623	ETS proto-oncogene 1, transcription factor	ETS1	2113	ENSG00000134954
ST14	971.518	-3.46928	1.21617	6.37737	0.041226	0.041226	suppression of tumorigenicity 14	ST14	6768	ENSG00000149418
ADAMTS15	705.062	2.91855	0.925912	9.65706	0.00799829	0.00799829	ADAM metallopeptidase with thrombospondin type 1 motif 15	ADAMTS15	170689	ENSG00000166106
OPCML	43.2671	-1.86687	1.37681	8.23263	0.0163044	0.0163044	opioid binding protein/cell adhesion molecule like	OPCML	4978	ENSG00000183715
ITFG2	479.756	0.70589	0.327825	6.38706	0.0410269	0.0410269	integrin alpha FG-GAP repeat containing 2	ITFG2	55846	ENSG00000111203
CCND2	2751.99	2.26134	0.731394	9.23168	0.00989386	0.00989386	cyclin D2	CCND2	894	ENSG00000118971
AC005833.2	3.37786	2.81283	1.42775	10.9604	0.0041686	0.0041686	NA	AC005833.2	NA	NA
LTBR	160.388	2.29378	0.868941	6.6064	0.0367654	0.0367654	lymphotoxin beta receptor	LTBR	4055	ENSG00000111321
IFFO1	543.606	1.21524	0.481304	6.63955	0.036161	0.036161	intermediate filament family orphan 1	IFFO1	25900	ENSG00000010295
SCARNA12	7.58231	2.13207	0.909194	9.19213	0.0100915	0.0100915	small Cajal body-specific RNA 12	SCARNA12	677777	ENSG00000238795
C1S	298.991	1.62858	0.739545	8.41426	0.0148891	0.0148891	complement C1s	C1S	716	ENSG00000182326
A2M	677.319	-6.02259	2.08494	6.62126	0.0364931	0.0364931	alpha-2-macroglobulin	A2M	2	ENSG00000175899
AC010168.2	73.9003	1.44555	0.648219	7.33046	0.0255983	0.0255983	NA	AC010168.2	NA	NA
ART4	121.943	4.89778	1.37893	12.5822	0.00185272	0.00185272	ADP-ribosyltransferase 4 (Dombrock blood group)	ART4	420	ENSG00000111339
RERG	121.132	4.35107	1.42891	7.57416	0.0226616	0.0226616	RAS like estrogen regulated growth inhibitor	RERG	85004	ENSG00000134533
SLCO1A2	481.423	-1.82252	0.650536	9.31106	0.00950885	0.00950885	solute carrier organic anion transporter family member 1A2	SLCO1A2	6579	ENSG00000084453
LRMP	71.0201	-3.22378	1.49669	6.4445	0.0398652	0.0398652	lymphoid restricted membrane protein	LRMP	4033	ENSG00000118308
KRAS	3242.88	-0.906727	0.320785	8.60522	0.0135332	0.0135332	KRAS proto-oncogene, GTPase	KRAS	3845	ENSG00000133703
PDZRN4	179.813	5.11934	1.78168	9.4638	0.00880971	0.00880971	PDZ domain containing ring finger 4	PDZRN4	29951	ENSG00000165966
AC008035.1	7.13546	2.97846	1.04277	9.35111	0.00932036	0.00932036	NA	AC008035.1	NA	NA
VDR	27.6261	2.74171	1.06161	7.33906	0.0254884	0.0254884	vitamin D receptor	VDR	7421	ENSG00000111424
AC004801.2	12.7602	1.29362	0.726981	7.21065	0.0271786	0.0271786	NA	AC004801.2	NA	NA
CCDC184	127.801	4.01164	1.44179	6.72076	0.034722	0.034722	coiled-coil domain containing 184	CCDC184	387856	ENSG00000177875
ZNF641	1459.6	2.17705	0.456063	28.7864	5.61201e-07	5.61201e-07	zinc finger protein 641	ZNF641	121274	ENSG00000167528
METTL7A	1002.31	3.27139	1.20943	6.39477	0.0408689	0.0408689	methyltransferase like 7A	METTL7A	25840	ENSG00000185432
KRT81	5.16476	8.1827	3.0824	7.67456	0.0215522	0.0215522	keratin 81	KRT81	3887	ENSG00000205426
AC076968.2	8.1644	4.20273	2.13093	6.28338	0.0432097	0.0432097	NA	AC076968.2	NA	NA
HOXC6	69.7974	3.58695	1.7249	6.93296	0.0312268	0.0312268	homeobox C6	HOXC6	3223	ENSG00000197757
AC079313.1	2.89955	-3.20026	1.5914	6.73932	0.0344013	0.0344013	NA	AC079313.1	NA	NA
IL23A	107.933	-1.73993	0.966015	6.08662	0.0476768	0.0476768	interleukin 23 subunit alpha	IL23A	51561	ENSG00000110944
CYP27B1	43.2146	1.11464	0.424966	11.7765	0.00277179	0.00277179	cytochrome P450 family 27 subfamily B member 1	CYP27B1	1594	ENSG00000111012
ATP23	56.894	-1.36011	0.486353	8.15175	0.0169774	0.0169774	ATP23 metallopeptidase and ATP synthase assembly factor homolog	ATP23	91419	ENSG00000166896
LINC02389	1.9437	-5.41456	2.58289	5.99854	0.0498235	0.0498235	long intergenic non-protein coding RNA 2389	LINC02389	400046	ENSG00000255693
FRS2	1468.82	-0.959125	0.33181	9.73712	0.00768443	0.00768443	fibroblast growth factor receptor substrate 2	FRS2	10818	ENSG00000166225
AC090015.1	27.5045	-1.51687	0.68389	7.1798	0.0276011	0.0276011	NA	AC090015.1	NA	NA
GLIPR1L1	35.9057	3.28213	1.25683	7.97549	0.0185415	0.0185415	GLIPR1 like 1	GLIPR1L1	256710	ENSG00000173401
EPYC	10.2505	0.47648	1.89371	9.04987	0.0108354	0.0108354	epiphycan	EPYC	1833	ENSG00000083782
AC124947.2	16.8536	-3.98206	1.39503	7.08829	0.0288934	0.0288934	NA	AC124947.2	NA	NA
AC124947.1	8.42702	-3.75886	1.56564	6.59584	0.0369599	0.0369599	NA	AC124947.1	NA	NA
HAL	30.8011	-2.49456	0.992249	6.00117	0.0497579	0.0497579	histidine ammonia-lyase	HAL	3034	ENSG00000084110
AC018659.8	7.73232	-5.11647	1.79551	9.68343	0.00789349	0.00789349	NA	AC018659.8	NA	NA
GLT8D2	257.312	2.36509	0.843984	11.7587	0.00279661	0.00279661	glycosyltransferase 8 domain containing 2	GLT8D2	83468	ENSG00000120820
EID3	26.9089	1.66743	0.718895	6.51819	0.0384231	0.0384231	EP300 interacting inhibitor of differentiation 3	EID3	493861	ENSG00000255150
HSPB8	743.339	-2.12238	1.14806	6.80746	0.033249	0.033249	heat shock protein family B (small) member 8	HSPB8	26353	ENSG00000152137
AC156455.1	4.04589	3.5216	1.79619	7.0483	0.0294769	0.0294769	NA	AC156455.1	NA	NA
HIP1R	1137.3	-1.25512	0.466761	8.27759	0.0159421	0.0159421	huntingtin interacting protein 1 related	HIP1R	9026	ENSG00000130787
AC108704.2	30.937	-1.85074	0.590365	10.2391	0.0059788	0.0059788	NA	AC108704.2	NA	NA
GLT1D1	267.57	-5.89257	1.68189	10.1764	0.00616924	0.00616924	glycosyltransferase 1 domain containing 1	GLT1D1	144423	ENSG00000151948
AC073912.2	3.00109	2.67622	1.98556	6.22407	0.0445103	0.0445103	NA	AC073912.2	NA	NA
CDX2	610.495	-0.240514	1.39787	6.16801	0.0457755	0.0457755	caudal type homeobox 2	CDX2	1045	ENSG00000165556
KL	12.5184	1.39015	0.949729	6.05743	0.0483778	0.0483778	klotho	KL	9365	ENSG00000133116
SMAD9	304.085	-1.64316	0.607342	11.0353	0.00401536	0.00401536	SMAD family member 9	SMAD9	4093	ENSG00000120693
LINC02334	50.8223	-0.464678	1.59998	7.62481	0.022095	0.022095	long intergenic non-protein coding RNA 2334	LINC02334	101929077	NA
ZDHHC4P1	3.21217	-5.60198	2.13248	7.18954	0.027467	0.027467	zinc finger DHHC-type containing 4 pseudogene 1	ZDHHC4P1	100420920	NA
LACC1	115.628	2.05319	0.721263	7.97143	0.0185792	0.0185792	laccase domain containing 1	LACC1	144811	ENSG00000179630
LINC01198	34.1437	-3.86566	1.72971	7.50385	0.0234725	0.0234725	long intergenic non-protein coding RNA 1198	LINC01198	101929344	ENSG00000231817
ITM2B	5701.99	0.681437	0.286959	6.66562	0.0356927	0.0356927	integral membrane protein 2B	ITM2B	9445	ENSG00000136156
CAB39L	486.053	0.805602	0.322954	9.1113	0.0105077	0.0105077	calcium binding protein 39 like	CAB39L	81617	ENSG00000102547
RCBTB1	2142.11	-0.379327	0.378011	6.25025	0.0439313	0.0439313	RCC1 and BTB domain containing protein 1	RCBTB1	55213	ENSG00000136144
TDRD3	499.179	-0.668137	0.209114	10.4834	0.00529138	0.00529138	tudor domain containing 3	TDRD3	81550	ENSG00000083544
DACH1	276.7	-1.37775	0.846098	7.16021	0.0278728	0.0278728	dachshund family transcription factor 1	DACH1	1602	ENSG00000276644
SCEL	168.43	-6.33045	2.43292	7.04864	0.0294718	0.0294718	sciellin	SCEL	8796	ENSG00000136155
EDNRB	3218.59	3.93052	1.42893	6.31695	0.0424904	0.0424904	endothelin receptor type B	EDNRB	1910	ENSG00000136160
AL139002.1	6.56157	5.89974	1.48592	19.3935	6.1483e-05	6.1483e-05	NA	AL139002.1	NA	NA
AL162493.1	3.58183	-1.39026	1.6636	7.16762	0.0277697	0.0277697	NA	AL162493.1	NA	NA
SLITRK6	164.113	-2.85114	1.43622	6.08897	0.0476208	0.0476208	SLIT and NTRK like family member 6	SLITRK6	84189	ENSG00000184564
FGF14	55.7318	3.64371	1.21951	8.14421	0.0170415	0.0170415	fibroblast growth factor 14	FGF14	2259	ENSG00000102466
KARS1P2	5.48921	-3.53355	1.45235	7.3224	0.0257016	0.0257016	lysyl-tRNA synthetase 1 pseudogene 2	KARS1P2	100419560	NA
TMEM255B	33.7465	2.56714	0.619905	16.8209	0.000222525	0.000222525	transmembrane protein 255B	TMEM255B	348013	ENSG00000184497
RASA3	376.936	1.90687	0.737533	6.37251	0.0413263	0.0413263	RAS p21 protein activator 3	RASA3	22821	ENSG00000185989
AL356019.2	55.6221	1.43048	0.482068	8.94238	0.0114337	0.0114337	NA	AL356019.2	NA	NA
RNF212B	7.07197	1.40648	1.07653	6.63133	0.03631	0.03631	ring finger protein 212B	RNF212B	100507650	ENSG00000215277
AL390334.1	34.3093	-3.1714	1.19399	6.37889	0.0411946	0.0411946	NA	AL390334.1	NA	NA
COCH	889.124	-2.0967	0.862123	10.3493	0.00565811	0.00565811	cochlin	COCH	1690	ENSG00000100473
AL049830.3	41.2962	-2.37009	0.945602	11.4355	0.00328716	0.00328716	NA	AL049830.3	NA	NA
AL162311.2	7.89713	2.08599	0.945969	6.18312	0.0454311	0.0454311	NA	AL162311.2	NA	NA
TTC6	91.1856	-3.57663	1.31958	6.01164	0.0494982	0.0494982	tetratricopeptide repeat domain 6	TTC6	319089	ENSG00000139865
DMAC2L	275.441	0.825446	0.339719	6.06797	0.0481236	0.0481236	distal membrane arm assembly complex 2 like	DMAC2L	27109	ENSG00000125375
AL138995.1	1.80395	4.67658	2.4047	6.8167	0.0330958	0.0330958	NA	AL138995.1	NA	NA
AL121820.3	17.9871	2.2149	1.15814	9.79896	0.00745044	0.00745044	NA	AL121820.3	NA	NA
BATF	22.0392	1.50311	2.61854	7.05184	0.0294247	0.0294247	basic leucine zipper ATF-like transcription factor	BATF	10538	ENSG00000156127
IRF2BPL	1930.03	0.985357	0.439687	6.62937	0.0363455	0.0363455	interferon regulatory factor 2 binding protein like	IRF2BPL	64207	ENSG00000119669
ISM2	32.7803	-2.79356	1.19523	7.69174	0.0213678	0.0213678	isthmin 2	ISM2	145501	ENSG00000100593
KCNK10	52.3594	-4.16318	1.15236	13.8589	0.000978525	0.000978525	potassium two pore domain channel subfamily K member 10	KCNK10	54207	ENSG00000100433
EML5	39.0855	-2.37166	0.927533	7.08617	0.028924	0.028924	EMAP like 5	EML5	161436	ENSG00000165521
BDKRB1	21.5271	2.47081	0.994422	8.52885	0.0140599	0.0140599	bradykinin receptor B1	BDKRB1	623	ENSG00000100739
EML1	931.107	-0.0630591	0.358529	6.33238	0.042164	0.042164	EMAP like 1	EML1	2009	ENSG00000066629
ANKRD9	887.97	-0.809516	0.319423	6.6069	0.0367561	0.0367561	ankyrin repeat domain 9	ANKRD9	122416	ENSG00000156381
LINC02691	5.90054	6.05025	1.96075	10.6269	0.00492488	0.00492488	long intergenic non-protein coding RNA 2691	LINC02691	145195	ENSG00000258913
CRIP1	8.8603	-5.07064	1.74274	8.84202	0.0120221	0.0120221	cysteine rich protein 1	CRIP1	1396	ENSG00000213145
PLCB2	275.92	2.64807	1.00861	7.08243	0.0289782	0.0289782	phospholipase C beta 2	PLCB2	5330	ENSG00000137841
SLC28A2	38.4166	-4.88539	1.52976	10.1872	0.00613585	0.00613585	solute carrier family 28 member 2	SLC28A2	9153	ENSG00000137860
AC100830.1	3.86839	-2.7901	1.51455	6.49776	0.0388177	0.0388177	NA	AC100830.1	NA	NA
RAB11A	4446.45	-0.556857	0.22831	8.63099	0.01336	0.01336	RAB11A, member RAS oncogene family	RAB11A	8766	ENSG00000103769
GRAMD2A	75.7008	-4.22572	1.21472	10.6317	0.00491304	0.00491304	GRAM domain containing 2A	GRAMD2A	196996	ENSG00000175318
LOXL1	1009.97	1.93315	0.706203	7.45305	0.0240763	0.0240763	lysyl oxidase like 1	LOXL1	4016	ENSG00000129038
C15orf39	1442.41	0.598787	0.346525	6.34971	0.0418002	0.0418002	chromosome 15 open reading frame 39	C15orf39	56905	ENSG00000167173
PTPN9	1986.53	0.580227	0.250571	6.00771	0.0495954	0.0495954	protein tyrosine phosphatase non-receptor type 9	PTPN9	5780	ENSG00000169410
BNC1	445.644	3.75431	1.29355	7.02221	0.029864	0.029864	basonuclin 1	BNC1	646	ENSG00000169594
ADAMTSL3	119.47	-2.73677	0.871707	9.49529	0.00867209	0.00867209	ADAMTS like 3	ADAMTSL3	57188	ENSG00000156218
ACAN	77.7493	2.23509	0.694906	13.7919	0.00101186	0.00101186	aggrecan	ACAN	176	ENSG00000157766
GOLGA2P8	3.7016	-3.80317	1.50493	7.97086	0.0185845	0.0185845	GOLGA2 pseudogene 8	GOLGA2P8	728477	NA
SLCO3A1	187.937	1.48027	0.586184	7.86109	0.019633	0.019633	solute carrier organic anion transporter family member 3A1	SLCO3A1	28232	ENSG00000176463
AC087477.2	7.97377	-2.9137	1.15559	7.49397	0.0235887	0.0235887	NA	AC087477.2	NA	NA
PRSS22	29.6482	-4.25152	1.58317	6.98098	0.0304859	0.0304859	serine protease 22	PRSS22	64063	ENSG00000005001
ADCY9	593.223	0.891714	0.357962	7.45499	0.024053	0.024053	adenylate cyclase 9	ADCY9	115	ENSG00000162104
METTL9	592.544	-0.566253	0.2398	7.52183	0.0232624	0.0232624	methyltransferase like 9	METTL9	51108	ENSG00000197006
UBFD1	4020.67	0.411307	0.155607	7.15057	0.0280074	0.0280074	ubiquitin family domain containing 1	UBFD1	56061	ENSG00000103353
SGF29	204.138	0.690161	0.261514	6.99047	0.0303416	0.0303416	SAGA complex associated factor 29	SGF29	112869	ENSG00000176476
AC009086.2	5.47748	-3.80902	1.3335	10.2931	0.00581958	0.00581958	NA	AC009086.2	NA	NA
SEPHS2	2903.11	-1.69469	0.681166	7.85591	0.0196839	0.0196839	selenophosphate synthetase 2	SEPHS2	22928	ENSG00000179918
ITGAX	4.7272	6.09615	2.26878	8.35442	0.0153412	0.0153412	integrin subunit alpha X	ITGAX	3687	ENSG00000140678
BMS1P8	14.461	-4.20086	2.36556	7.693	0.0213543	0.0213543	BMS1 pseudogene 8	BMS1P8	653557	NA
RAB43P1	1.76819	0.628389	1.86829	7.45265	0.0240812	0.0240812	RAB43 pseudogene 1	RAB43P1	440375	NA
GPT2	3551.04	-1.00283	0.468777	6.17917	0.0455209	0.0455209	glutamic--pyruvic transaminase 2	GPT2	84706	ENSG00000166123
CPNE2	659.464	1.78354	0.593874	9.47034	0.00878097	0.00878097	copine 2	CPNE2	221184	ENSG00000140848
RRAD	89.6105	0.783466	0.734575	14.6984	0.000643108	0.000643108	RRAD, Ras related glycolysis inhibitor and calcium channel regulator	RRAD	6236	ENSG00000166592
AC126773.4	37.4597	2.38506	0.869131	12.3381	0.00209319	0.00209319	NA	AC126773.4	NA	NA
FTLP14	8.83427	-3.13851	1.24822	6.43789	0.0399972	0.0399972	ferritin light chain pseudogene 14	FTLP14	100462794	NA
TAT	3.52418	-4.77344	2.00427	7.81023	0.0201386	0.0201386	tyrosine aminotransferase	TAT	6898	ENSG00000198650
AC022165.1	1.70213	-3.01774	2.00757	7.17099	0.027723	0.027723	NA	AC022165.1	NA	NA
AC092275.1	9.42836	3.11736	1.45702	6.99353	0.0302952	0.0302952	NA	AC092275.1	NA	NA
FENDRR	174.826	4.4088	1.82223	6.41416	0.0404747	0.0404747	FOXF1 adjacent non-coding developmental regulatory RNA	FENDRR	400550	ENSG00000268388
FOXF1	293.548	4.10105	1.52191	6.45679	0.039621	0.039621	forkhead box F1	FOXF1	2294	ENSG00000103241
FOXL1	48.5775	3.30422	0.886741	13.6685	0.00107627	0.00107627	forkhead box L1	FOXL1	2300	ENSG00000176678
ZNF469	192.865	2.35364	0.80549	8.53542	0.0140138	0.0140138	zinc finger protein 469	ZNF469	84627	ENSG00000225614
CPNE7	122.112	2.27611	1.00412	7.1253	0.0283635	0.0283635	copine 7	CPNE7	27132	ENSG00000178773
SERPINF2	62.6171	-5.7631	1.5965	9.93684	0.00695412	0.00695412	serpin family F member 2	SERPINF2	5345	ENSG00000167711
NCBP3	2732.82	0.303126	0.1664	7.0154	0.0299658	0.0299658	nuclear cap binding subunit 3	NCBP3	55421	ENSG00000074356
ASGR2	128.741	-5.22541	2.03405	6.94331	0.0310655	0.0310655	asialoglycoprotein receptor 2	ASGR2	433	ENSG00000161944
ELP5	316.379	-0.80381	0.323933	6.30354	0.0427764	0.0427764	elongator acetyltransferase complex subunit 5	ELP5	23587	ENSG00000170291
CLDN7	248.531	-3.27243	1.24883	6.08503	0.0477147	0.0477147	claudin 7	CLDN7	1366	ENSG00000181885
TMEM107	206.93	-1.5435	0.544815	7.79421	0.0203006	0.0203006	transmembrane protein 107	TMEM107	84314	ENSG00000179029
ADORA2B	144.435	1.52015	0.566869	7.81697	0.0200709	0.0200709	adenosine A2b receptor	ADORA2B	136	ENSG00000170425
RASD1	168.447	-1.70907	0.686994	7.30458	0.0259317	0.0259317	ras related dexamethasone induced 1	RASD1	51655	ENSG00000108551
FAM106A	52.2915	-3.1554	1.2723	6.29749	0.0429059	0.0429059	family with sequence similarity 106 member A	FAM106A	80039	ENSG00000273018
SLC47A1	203.412	1.96566	0.655701	10.0377	0.00661202	0.00661202	solute carrier family 47 member 1	SLC47A1	55244	ENSG00000142494
UBBP4	62.7781	0.619265	1.09037	8.61513	0.0134663	0.0134663	ubiquitin B pseudogene 4	UBBP4	23666	ENSG00000263563
SLC6A4	33.1775	-4.42526	1.36723	9.97109	0.00683605	0.00683605	solute carrier family 6 member 4	SLC6A4	6532	ENSG00000108576
AC116407.1	7.75531	1.96582	0.961073	7.1738	0.027684	0.027684	NA	AC116407.1	NA	NA
MMP28	26.0576	2.23079	1.03091	7.89165	0.0193352	0.0193352	matrix metallopeptidase 28	MMP28	79148	ENSG00000271447
ARHGAP23	451.561	3.60491	0.919853	14.5553	0.000690811	0.000690811	Rho GTPase activating protein 23	ARHGAP23	57636	ENSG00000275832
AC244153.1	18.4315	3.63231	1.30161	10.1146	0.00636265	0.00636265	NA	AC244153.1	NA	NA
STAT5A	147.649	1.29131	0.602555	10.9841	0.00411947	0.00411947	signal transducer and activator of transcription 5A	STAT5A	6776	ENSG00000126561
SOST	142.673	-4.56189	2.33648	8.51713	0.0141426	0.0141426	sclerostin	SOST	50964	ENSG00000167941
GFAP	10.8848	4.12293	1.44057	9.75413	0.00761934	0.00761934	glial fibrillary acidic protein	GFAP	2670	ENSG00000131095
ARHGAP27	59.0883	-1.99753	0.693302	8.22181	0.016393	0.016393	Rho GTPase activating protein 27	ARHGAP27	201176	ENSG00000159314
HOXB-AS3	32.9013	1.68067	1.76577	6.96963	0.0306594	0.0306594	HOXB cluster antisense RNA 3	HOXB-AS3	404266	ENSG00000233101
HOXB6	92.3302	3.78315	1.62345	9.43159	0.00895274	0.00895274	homeobox B6	HOXB6	3216	ENSG00000108511
SGCA	7.73468	-0.844433	1.49243	6.19574	0.0451452	0.0451452	sarcoglycan alpha	SGCA	6442	ENSG00000108823
MMD	1671.38	-1.70555	0.565759	8.98919	0.0111692	0.0111692	monocyte to macrophage differentiation associated	MMD	23531	ENSG00000108960
SNORD104	87.9425	1.02743	0.379684	7.92621	0.019004	0.019004	small nucleolar RNA, C/D box 104	SNORD104	692227	ENSG00000199753
GNA13	3661.59	-1.15038	0.432119	7.57716	0.0226278	0.0226278	G protein subunit alpha 13	GNA13	10672	ENSG00000120063
LINC00674	54.0552	0.99706	0.420881	8.36065	0.0152935	0.0152935	long intergenic non-protein coding RNA 674	LINC00674	100499466	NA
LRRC37A16P	95.6312	1.20446	0.424126	9.27689	0.00967275	0.00967275	leucine rich repeat containing 37 member A16, pseudogene	LRRC37A16P	651250	NA
AC005332.5	49.9261	0.92933	0.481305	6.30969	0.0426451	0.0426451	NA	AC005332.5	NA	NA
ZACN	3.80131	1.17564	1.66922	6.42093	0.0403379	0.0403379	zinc activated ion channel	ZACN	353174	ENSG00000186919
FOXJ1	157.762	-2.91032	1.1459	6.4521	0.0397141	0.0397141	forkhead box J1	FOXJ1	2302	ENSG00000129654
CYGB	176.964	2.94097	1.03472	9.20895	0.010007	0.010007	cytoglobin	CYGB	114757	ENSG00000161544
PRCD	38.2292	2.29056	1.04839	7.52332	0.0232451	0.0232451	photoreceptor disc component	PRCD	768206	ENSG00000214140
SEPTIN9	10429.9	0.404224	0.178406	10.687	0.00477918	0.00477918	septin 9	SEPTIN9	10801	ENSG00000184640
TMEM235	22.7702	4.90848	1.50939	11.981	0.00250239	0.00250239	transmembrane protein 235	TMEM235	283999	ENSG00000204278
AC087741.2	5.27153	2.10135	1.08145	6.10467	0.0472486	0.0472486	NA	AC087741.2	NA	NA
AC027601.2	26.2407	0.565292	0.506238	6.43975	0.03996	0.03996	NA	AC027601.2	NA	NA
AC124283.3	3.08327	-4.23425	1.60002	7.55978	0.0228253	0.0228253	NA	AC124283.3	NA	NA
CLUL1	23.2626	-1.0923	0.639508	6.11233	0.0470678	0.0470678	clusterin like 1	CLUL1	27098	ENSG00000079101
TYMSOS	82.2086	-1.62391	0.880626	6.6161	0.0365875	0.0365875	TYMS opposite strand	TYMSOS	494514	ENSG00000176912
LINC00470	90.9347	-3.58375	0.870005	17.7655	0.00013876	0.00013876	long intergenic non-protein coding RNA 470	LINC00470	56651	NA
AP001029.1	2.62222	-3.43736	1.90323	6.6694	0.0356254	0.0356254	NA	AP001029.1	NA	NA
CXADRP3	58.515	4.05704	1.90099	7.62614	0.0220803	0.0220803	CXADR pseudogene 3	CXADRP3	440224	ENSG00000265766
LINC01915	3.07016	-2.86092	1.51137	6.20497	0.0449375	0.0449375	long intergenic non-protein coding RNA 1915	LINC01915	729950	ENSG00000265485
DSC3	807.571	4.08573	1.17892	12.049	0.00241872	0.00241872	desmocollin 3	DSC3	1825	ENSG00000134762
TTR	10964.7	-7.73058	2.13681	10.3939	0.00553328	0.00553328	transthyretin	TTR	7276	ENSG00000118271
FHOD3	376.312	-1.20668	0.557317	7.55174	0.0229172	0.0229172	formin homology 2 domain containing 3	FHOD3	80206	ENSG00000134775
AC090241.3	4.85758	2.63324	1.12866	7.14009	0.0281545	0.0281545	NA	AC090241.3	NA	NA
TPMTP1	5.10587	-1.65394	1.27389	6.72518	0.0346455	0.0346455	thiopurine S-methyltransferase pseudogene 1	TPMTP1	400650	NA
ZBTB7C	28.1953	3.96938	1.31974	9.11805	0.0104723	0.0104723	zinc finger and BTB domain containing 7C	ZBTB7C	201501	ENSG00000184828
CXXC1	1339.86	0.459632	0.12879	15.301	0.000475807	0.000475807	CXXC finger protein 1	CXXC1	30827	ENSG00000154832
ST8SIA3	92.1002	-3.83148	1.30511	7.66445	0.0216614	0.0216614	ST8 alpha-N-acetyl-neuraminide alpha-2,8-sialyltransferase 3	ST8SIA3	51046	ENSG00000177511
AC090340.1	3.12888	-7.61034	2.51361	11.3088	0.00350204	0.00350204	NA	AC090340.1	NA	NA
ONECUT2	825.208	-4.97682	1.51536	8.98413	0.0111975	0.0111975	one cut homeobox 2	ONECUT2	9480	ENSG00000119547
DIPK1C	4.87353	-4.4836	1.97228	6.79808	0.0334053	0.0334053	divergent protein kinase domain 1C	DIPK1C	125704	ENSG00000187773
ZNF77	120.734	-1.42808	0.51582	8.12222	0.0172299	0.0172299	zinc finger protein 77	ZNF77	58492	ENSG00000175691
TBXA2R	84.5982	3.88126	1.23615	11.0706	0.00394502	0.00394502	thromboxane A2 receptor	TBXA2R	6915	ENSG00000006638
ZNF558	1059.59	-0.937525	0.318611	9.28106	0.00965257	0.00965257	zinc finger protein 558	ZNF558	148156	ENSG00000167785
OR7D2	21.9644	2.20147	1.55089	6.17605	0.0455919	0.0455919	olfactory receptor family 7 subfamily D member 2	OR7D2	162998	ENSG00000188000
SHFL	135.94	2.22957	0.84571	7.98853	0.018421	0.018421	shiftless antiviral inhibitor of ribosomal frameshifting	SHFL	55337	ENSG00000130813
ANGPTL6	94.8724	6.33001	1.5826	15.9609	0.000342088	0.000342088	angiopoietin like 6	ANGPTL6	83854	ENSG00000130812
KRI1	1128.33	0.324125	0.207248	11.7564	0.00279979	0.00279979	KRI1 homolog	KRI1	65095	ENSG00000129347
SNRPGP15	13.795	1.82805	0.683832	7.267	0.0264236	0.0264236	small nuclear ribonucleoprotein polypeptide G pseudogene 15	SNRPGP15	100130932	NA
SYDE1	750.106	1.87173	0.739522	6.53514	0.0380989	0.0380989	synapse defective Rho GTPase homolog 1	SYDE1	85360	ENSG00000105137
AC003956.1	4.83296	-2.6523	1.36162	6.8872	0.0319494	0.0319494	NA	AC003956.1	NA	NA
ZNF93	1075.55	-0.719543	0.303819	6.63666	0.0362132	0.0362132	zinc finger protein 93	ZNF93	81931	ENSG00000184635
AC011447.6	81.7816	-2.79237	0.9867	7.46475	0.0239359	0.0239359	NA	AC011447.6	NA	NA
AC011447.7	319.924	-3.28246	1.2062	6.6914	0.0352355	0.0352355	NA	AC011447.7	NA	NA
BNIP3P17	86.845	-2.58038	1.02128	6.09837	0.0473974	0.0473974	BCL2 interacting protein 3 pseudogene 17	BNIP3P17	100421704	NA
ZNF257	139.119	-3.49196	1.3589	6.15974	0.0459652	0.0459652	zinc finger protein 257	ZNF257	113835	ENSG00000197134
ZNF676	2.40834	-5.71006	2.39773	6.1624	0.0459041	0.0459041	zinc finger protein 676	ZNF676	163223	ENSG00000196109
LINC00906	1.92101	4.63465	2.77629	7.50562	0.0234518	0.0234518	long intergenic non-protein coding RNA 906	LINC00906	148145	ENSG00000267339
TYROBP	2.73502	5.48873	2.1189	7.89664	0.0192871	0.0192871	TYRO protein tyrosine kinase binding protein	TYROBP	7305	ENSG00000011600
IFNL1	26.8097	-5.04176	1.95076	6.86911	0.0322398	0.0322398	interferon lambda 1	IFNL1	282618	ENSG00000182393
PSG1	3.78411	-6.01868	2.6239	9.41432	0.00903037	0.00903037	pregnancy specific beta-1-glycoprotein 1	PSG1	5669	ENSG00000231924
PSG5	12.9296	-5.72533	2.27274	13.357	0.00125765	0.00125765	pregnancy specific beta-1-glycoprotein 5	PSG5	5673	ENSG00000204941
PHLDB3	420.441	-1.81001	0.704385	7.91314	0.0191286	0.0191286	pleckstrin homology like domain family B member 3	PHLDB3	653583	ENSG00000176531
IGSF23	25.165	-6.18071	1.99914	8.66915	0.0131074	0.0131074	immunoglobulin superfamily member 23	IGSF23	147710	ENSG00000216588
EXOC3L2	99.7442	2.70925	1.0777	6.36284	0.0415267	0.0415267	exocyst complex component 3 like 2	EXOC3L2	90332	ENSG00000283632
AC006262.1	9.30404	1.55775	0.809772	6.6185	0.0365435	0.0365435	NA	AC006262.1	NA	NA
DACT3-AS1	8.74308	2.15625	1.09971	8.26617	0.0160333	0.0160333	DACT3 antisense RNA 1	DACT3-AS1	100506068	ENSG00000245598
AC073548.2	5.35133	2.17004	1.12509	8.44915	0.0146315	0.0146315	NA	AC073548.2	NA	NA
CARD8-AS1	18.6116	1.57549	1.26917	6.01729	0.0493585	0.0493585	CARD8 antisense RNA 1	CARD8-AS1	100505812	ENSG00000268001
EMP3	713.069	2.46512	0.922933	6.64974	0.0359771	0.0359771	epithelial membrane protein 3	EMP3	2014	ENSG00000142227
KCNC3	104.614	-3.17086	1.61715	8.90669	0.0116396	0.0116396	potassium voltage-gated channel subfamily C member 3	KCNC3	3748	ENSG00000131398
ETFB	364.668	-0.880016	0.369968	6.86426	0.032318	0.032318	electron transfer flavoprotein subunit beta	ETFB	2109	ENSG00000105379
SIGLEC6	5.53777	-6.17278	2.34948	14.6305	0.000665324	0.000665324	sialic acid binding Ig like lectin 6	SIGLEC6	946	ENSG00000105492
AC010327.8	3.81974	-1.78151	1.65603	8.1607	0.0169016	0.0169016	NA	AC010327.8	NA	NA
PTPRH	44.7248	2.04967	0.885066	6.70618	0.0349761	0.0349761	protein tyrosine phosphatase receptor type H	PTPRH	5794	ENSG00000080031
ZNF749	391.919	-0.628258	0.250918	8.25767	0.0161016	0.0161016	zinc finger protein 749	ZNF749	388567	ENSG00000186230
ZSCAN4	11.6565	1.00025	1.10844	7.20832	0.0272103	0.0272103	zinc finger and SCAN domain containing 4	ZSCAN4	201516	ENSG00000180532
AC012313.3	17.1415	-1.38257	0.733117	7.87303	0.0195161	0.0195161	NA	AC012313.3	NA	NA
OXT	6.51207	4.18623	1.77443	10.2162	0.00604744	0.00604744	oxytocin/neurophysin I prepropeptide	OXT	5020	ENSG00000101405
ADAM33	719.813	2.97166	1.08404	6.83772	0.0327498	0.0327498	ADAM metallopeptidase domain 33	ADAM33	80332	ENSG00000149451
GPCPD1	652.339	-1.07169	0.377193	8.31859	0.0156186	0.0156186	glycerophosphocholine phosphodiesterase 1	GPCPD1	56261	ENSG00000125772
PCSK2	80.4806	0.427297	1.35043	6.5745	0.0373565	0.0373565	proprotein convertase subtilisin/kexin type 2	PCSK2	5126	ENSG00000125851
THBD	138.872	1.96214	1.33082	6.74346	0.0343302	0.0343302	thrombomodulin	THBD	7056	ENSG00000178726
NXT1-AS1	3.16639	1.03923	1.50511	6.16553	0.0458324	0.0458324	NXT1 antisense RNA 1	NXT1-AS1	105372572	NA
MLLT10P1	3.0786	2.6153	1.72565	6.43874	0.0399802	0.0399802	MLLT10 pseudogene 1	MLLT10P1	140678	NA
NNAT	512.002	-2.64232	1.05093	10.5435	0.00513465	0.00513465	neuronatin	NNAT	4826	ENSG00000053438
TGM2	263.704	1.9871	0.779156	8.03155	0.018029	0.018029	transglutaminase 2	TGM2	7052	ENSG00000198959
LBP	7.73421	-4.16073	1.53434	7.29083	0.0261106	0.0261106	lipopolysaccharide binding protein	LBP	3929	ENSG00000129988
SLPI	17.2279	3.70292	1.22858	9.66435	0.00796915	0.00796915	secretory leukocyte peptidase inhibitor	SLPI	6590	ENSG00000124107
WFDC2	1048.31	-3.93355	1.24236	8.23199	0.0163097	0.0163097	WAP four-disulfide core domain 2	WFDC2	10406	ENSG00000101443
SNX21	287.707	0.34394	0.229907	6.61757	0.0365605	0.0365605	sorting nexin family member 21	SNX21	90203	ENSG00000124104
NCOA3	2011.32	-0.999326	0.41403	8.14688	0.0170187	0.0170187	nuclear receptor coactivator 3	NCOA3	8202	ENSG00000124151
SNAP23P1	1.13321	6.81429	2.95401	6.51135	0.0385548	0.0385548	synaptosome associated protein 23 pseudogene 1	SNAP23P1	101290500	NA
PTGIS	1080.56	1.01412	0.626406	9.12372	0.0104426	0.0104426	prostaglandin I2 synthase	PTGIS	5740	ENSG00000124212
RIPOR3	195.22	4.08719	1.44206	10.1042	0.00639599	0.00639599	RIPOR family member 3	RIPOR3	140876	ENSG00000042062
BCAS1	10.7652	-3.48744	1.2517	7.53608	0.0230973	0.0230973	breast carcinoma amplified sequence 1	BCAS1	8537	ENSG00000064787
PCK1	7.69483	-3.73396	2.53841	6.32431	0.0423345	0.0423345	phosphoenolpyruvate carboxykinase 1	PCK1	5105	ENSG00000124253
PHACTR3	46.4274	-4.23177	1.48802	7.17219	0.0277063	0.0277063	phosphatase and actin regulator 3	PHACTR3	116154	ENSG00000087495
AL117372.1	11.1979	4.8148	1.63217	9.02619	0.0109645	0.0109645	NA	AL117372.1	NA	NA
CR381653.2	4.28186	3.56899	1.52409	7.72295	0.0210369	0.0210369	NA	CR381653.2	NA	NA
LINC02246	5.81634	-2.53565	1.19077	6.11369	0.0470359	0.0470359	long intergenic non-protein coding RNA 2246	LINC02246	107987295	NA
APP	27732.3	0.856879	0.36557	7.62723	0.0220683	0.0220683	amyloid beta precursor protein	APP	351	ENSG00000142192
DSCAM	245.234	-4.01526	1.98635	7.16536	0.0278011	0.0278011	DS cell adhesion molecule	DSCAM	1826	ENSG00000171587
TFF3	39.4997	-3.94342	1.47951	8.35545	0.0153334	0.0153334	trefoil factor 3	TFF3	7033	ENSG00000160180
COL6A1	11424.8	2.72553	0.7598	12.5215	0.00190981	0.00190981	collagen type VI alpha 1 chain	COL6A1	1291	ENSG00000142156
COL6A2	11477	3.02589	0.948553	9.88948	0.00712076	0.00712076	collagen type VI alpha 2 chain	COL6A2	1292	ENSG00000142173
AC007666.1	2.67807	-1.11961	1.83241	6.35668	0.0416548	0.0416548	NA	AC007666.1	NA	NA
P2RX6	12.0109	2.76698	1.14917	7.35606	0.0252727	0.0252727	purinergic receptor P2X 6	P2RX6	9127	ENSG00000099957
SLC7A4	35.2919	2.93218	1.07131	7.7797	0.0204485	0.0204485	solute carrier family 7 member 4	SLC7A4	6545	ENSG00000099960
C22orf15	12.7298	6.53559	2.22817	8.81546	0.0121828	0.0121828	chromosome 22 open reading frame 15	C22orf15	150248	ENSG00000169314
DERL3	13.394	-3.29921	1.38193	8.13991	0.0170782	0.0170782	derlin 3	DERL3	91319	ENSG00000099958
GGT5	74.3381	4.2884	1.18337	11.3712	0.0033945	0.0033945	gamma-glutamyltransferase 5	GGT5	2687	ENSG00000099998
BCRP3	9.78931	3.53895	1.31426	8.63827	0.0133114	0.0133114	BCR pseudogene 3	BCRP3	644165	NA
AP000357.1	4.50133	3.09442	1.30837	6.04242	0.0487423	0.0487423	NA	AP000357.1	NA	NA
PLA2G3	430.489	-2.4269	1.08976	7.02573	0.0298114	0.0298114	phospholipase A2 group III	PLA2G3	50487	ENSG00000100078
DRG1	2072.08	-0.966329	0.359937	9.04071	0.0108851	0.0108851	developmentally regulated GTP binding protein 1	DRG1	4733	ENSG00000185721
IL2RB	47.0525	3.34166	1.29944	6.47978	0.0391681	0.0391681	interleukin 2 receptor subunit beta	IL2RB	3560	ENSG00000100385
AL031595.3	39.8796	2.76091	0.754656	16.2284	0.000299257	0.000299257	NA	AL031595.3	NA	NA
MLC1	22.5797	6.49779	1.93481	12.4396	0.00198962	0.00198962	modulator of VRAC current 1	MLC1	23209	ENSG00000100427
MOV10L1	9.77826	2.53098	1.05884	6.54776	0.0378593	0.0378593	Mov10 like RISC complex RNA helicase 1	MOV10L1	54456	ENSG00000073146
CHKB	32.4056	1.21318	0.495379	6.1431	0.0463493	0.0463493	choline kinase beta	CHKB	1120	ENSG00000100288
AC006062.1	2.64942	9.15084	3.2193	8.66992	0.0131024	0.0131024	NA	AC006062.1	NA	NA
DMD	1601.42	1.26163	0.601842	6.64346	0.0360903	0.0360903	dystrophin	DMD	1756	ENSG00000198947
ATP5MC2P4	6.09155	2.23717	1.12761	7.90168	0.0192385	0.0192385	ATP synthase membrane subunit c locus 2 pseudogene 4	ATP5MC2P4	654480	NA
UBA1	11389.6	0.260688	0.119533	7.9933	0.0183771	0.0183771	ubiquitin like modifier activating enzyme 1	UBA1	7317	ENSG00000130985
AC232271.3	3.52503	3.93223	1.54274	7.65878	0.0217229	0.0217229	NA	AC232271.3	NA	NA
DGKK	265.916	-3.01245	1.09927	7.49921	0.023527	0.023527	diacylglycerol kinase kappa	DGKK	139189	ENSG00000274588
SHROOM4	535.576	-0.805375	0.50319	8.34568	0.0154084	0.0154084	shroom family member 4	SHROOM4	57477	ENSG00000158352
SPIN4	574.73	2.27883	0.638613	12.2941	0.00213983	0.00213983	spindlin family member 4	SPIN4	139886	ENSG00000186767
FAM155B	564.067	-3.48208	1.24083	6.95843	0.0308317	0.0308317	family with sequence similarity 155 member B	FAM155B	27112	ENSG00000130054
IL2RG	7.25684	-4.55651	1.82289	6.65039	0.0359655	0.0359655	interleukin 2 receptor subunit gamma	IL2RG	3561	ENSG00000147168
RPSAP15	11.0323	2.99106	1.25881	8.98782	0.0111769	0.0111769	ribosomal protein SA pseudogene 15	RPSAP15	220885	NA
ARMCX2	2628.7	0.581497	0.236956	6.01	0.0495388	0.0495388	armadillo repeat containing X-linked 2	ARMCX2	9823	ENSG00000184867
RNF128	317.296	-5.12389	1.71147	8.09045	0.0175058	0.0175058	ring finger protein 128	RNF128	79589	ENSG00000133135
MIR503HG	277.07	2.95521	0.910235	9.77811	0.00752853	0.00752853	MIR503 host gene	MIR503HG	84848	NA
GPR50	13.7633	3.56828	1.43372	6.4536	0.0396844	0.0396844	G protein-coupled receptor 50	GPR50	9248	ENSG00000102195
LINC00278	8.1728	-5.8569	1.54471	14.9206	0.000575484	0.000575484	long intergenic non-protein coding RNA 278	LINC00278	100873962	ENSG00000231535
AMELY	8.52231	-8.21009	1.85441	21.0273	2.71636e-05	2.71636e-05	amelogenin Y-linked	AMELY	266	ENSG00000099721
TBL1Y	237.868	-1.43493	0.764761	6.5638	0.0375567	0.0375567	transducin beta like 1 Y-linked	TBL1Y	90665	ENSG00000092377
MXRA5Y	10.1144	-5.75385	2.34308	7.64978	0.0218208	0.0218208	matrix remodeling associated 5 Y-linked (pseudogene)	MXRA5Y	286544	NA
